# Supplementary material for: Postnatal depression and intimate partner violence: a nationwide clinic-based cross-sectional study in Malaysia
Source: PubMed Central journal article supplement — BMJ Open. 2018 May 14;8(5):e020649. doi: 10.1136/bmjopen-2017-020649 (PMC5961592; doi:10.1136/bmjopen-2017-020649), 2018-05-14
Supplement: bmjopen-2017-020649.draft_revisions.pdf [file bmjopen-2017-020649.draft_revisions.pdf]

# BMJ Open

BMJ Open is committed to open peer review. As part of this commitment we make the peer review history of every article we publish publicly available.

When an article is published we post the peer reviewers' comments and the authors' responses online. We also post the versions of the paper that were used during peer review. These are the versions that the peer review comments apply to.

The versions of the paper that follow are the versions that were submitted during the peer review process. They are not the versions of record or the final published versions. They should not be cited or distributed as the published version of this manuscript.

BMJ Open is an open access journal and the full, final, typeset and author-corrected version of record of the manuscript is available on our site with no access controls, subscription charges or pay-per-view fees (<http://bmjopen.bmj.com>).

If you have any questions on BMJ Open's open peer review process please email [info.bmjopen@bmj.com](mailto:info.bmjopen@bmj.com)

# BMJ Open

## Postnatal depression and intimate partner violence: a nationwide clinic-based study in Malaysia

|                                 |                                                                                                                                                                                                                                                                                                                                                                                                                                                                                                                                                                                                                                                                                                                                                                                                                                                                                                                                                                                                                                                                                                                                          |
|---------------------------------|------------------------------------------------------------------------------------------------------------------------------------------------------------------------------------------------------------------------------------------------------------------------------------------------------------------------------------------------------------------------------------------------------------------------------------------------------------------------------------------------------------------------------------------------------------------------------------------------------------------------------------------------------------------------------------------------------------------------------------------------------------------------------------------------------------------------------------------------------------------------------------------------------------------------------------------------------------------------------------------------------------------------------------------------------------------------------------------------------------------------------------------|
| Journal:                        | <i>BMJ Open</i>                                                                                                                                                                                                                                                                                                                                                                                                                                                                                                                                                                                                                                                                                                                                                                                                                                                                                                                                                                                                                                                                                                                          |
| Manuscript ID                   | bmjopen-2017-020649                                                                                                                                                                                                                                                                                                                                                                                                                                                                                                                                                                                                                                                                                                                                                                                                                                                                                                                                                                                                                                                                                                                      |
| Article Type:                   | Research                                                                                                                                                                                                                                                                                                                                                                                                                                                                                                                                                                                                                                                                                                                                                                                                                                                                                                                                                                                                                                                                                                                                 |
| Date Submitted by the Author:   | 04-Dec-2017                                                                                                                                                                                                                                                                                                                                                                                                                                                                                                                                                                                                                                                                                                                                                                                                                                                                                                                                                                                                                                                                                                                              |
| Complete List of Authors:       | Ahmad, Noor Ani; Institute for Public Health, National Institutes of Health, Ministry of Health Malaysia<br>Silim, Umi Adzlin ; Hospital Kuala Lumpur, Ministry of Health Malaysia<br>Rosman, Azriman; Department of Public Health, Ministry of Health Malaysia<br>Mohamad, Majdah ; Department of Public Health, Ministry of Health Malaysia<br>Chan, Ying Ying; Institute for Public Health, Ministry of Health Malaysia<br>Mohd Kasim, Noraidda; Institute for Public Health, Ministry of Health Malaysia<br>Yusof, Muslimah; Institute for Public Health, Ministry of Health Malaysia<br>Abdul Razak, Aznuddin; Institute for Public Health, Ministry of Health Malaysia<br>Omar, Maisarah; Institute for Public Health, Ministry of Health Malaysia<br>Abdul Aziz, Fazly Azry; Institute for Public health, Ministry of Health Malaysia<br>Jamaluddin, Rasidah; institute for Public Health, Ministry of Health Malaysia<br>Ismail, Fatanah; Department of Public Health, Ministry of Health Malaysia<br>Ibrahim, Nurashikin; Department of Public Health, Ministry of Health Malaysia<br>Aris, Tahir; Institute for Public Health, |
| <b>Primary Subject Heading</b>: | Mental health                                                                                                                                                                                                                                                                                                                                                                                                                                                                                                                                                                                                                                                                                                                                                                                                                                                                                                                                                                                                                                                                                                                            |
| Secondary Subject Heading:      | Public health                                                                                                                                                                                                                                                                                                                                                                                                                                                                                                                                                                                                                                                                                                                                                                                                                                                                                                                                                                                                                                                                                                                            |
| Keywords:                       | MENTAL HEALTH, Depression & mood disorders < PSYCHIATRY, EPIDEMIOLOGY                                                                                                                                                                                                                                                                                                                                                                                                                                                                                                                                                                                                                                                                                                                                                                                                                                                                                                                                                                                                                                                                    |
|                                 |                                                                                                                                                                                                                                                                                                                                                                                                                                                                                                                                                                                                                                                                                                                                                                                                                                                                                                                                                                                                                                                                                                                                          |

SCHOLARONE™  
Manuscripts

1  
2  
3 **Postnatal depression and intimate partner violence: a nationwide clinic-based study in**  
4  
5 **Malaysia**  
6  
7  
8

9 Noor Ani Ahmad,<sup>1</sup> Umi Adzlin Silim,<sup>2</sup> Azriman Rosman,<sup>3</sup> Majdah Mohamad,<sup>3</sup> Chan Ying Ying,<sup>1</sup>  
10  
11 Noraida Mohd Kasim,<sup>1</sup> Muslimah Yusof,<sup>1</sup> Aznuddin Abd Razak,<sup>1</sup> Maisarah Omar,<sup>1</sup> Fazly Azry  
12  
13 Abd Aziz,<sup>1</sup> Rasidah Jamaludin,<sup>1</sup> Fatanah Ismail,<sup>3</sup> Nurashikin Ibrahim,<sup>3</sup> Tahir Aris.<sup>1</sup>  
14  
15  
16  
17  
18

19 <sup>1</sup>Institute for Public Health, Ministry of Health Malaysia  
20

21 <sup>2</sup>Hospital Kuala Lumpur, Ministry of Health Malaysia  
22

23 <sup>3</sup>Public Health Department, Ministry of Health Malaysia  
24  
25  
26  
27  
28  
29  
30  
31  
32

33 **List of Authors**  
34  
35  
36

37 Noor Ani Ahmad, MBBS, MPH  
38

39 Centre for Family Health Research  
40

41 Institute for Public Health  
42

43 Ministry of Health Malaysia  
44

45 Jln Bangsar,  
46

47 Kuala Lumpur, Malaysia  
48  
49  
50  
51  
52

53 Umi Adzlin Silim, MD, Mmed (Psychiatry)  
54

55 Department of Psychiatry  
56  
57  
58  
59  
60

1  
2  
3 Hospital Kuala Lumpur

4  
5 Kuala Lumpur, Malaysia

6  
7  
8  
9  
10 Azriman Rosman, MBBS, MPH

11  
12 Department of Public Health

13  
14 Ministry of Health Malaysia

15  
16 Putrajaya, Malaysia

17  
18  
19  
20  
21 Majdah Mohamad, MD, MPH

22  
23 Department of Public Health

24  
25 Ministry of Health Malaysia

26  
27 Putrajaya, Malaysia

28  
29  
30  
31  
32 Chan Ying Ying (MMedSc)

33  
34 Centre for Family Health Research

35  
36 Institute for Public Health

37  
38 Ministry of Health Malaysia

39  
40  
41 Jln Bangsar,

42  
43 Kuala Lumpur, Malaysia

44  
45  
46  
47  
48 Noraida Mohd Kasim, MSc (Nursing)

49  
50 Centre for Family Health Research

51  
52 Institute for Public Health

53  
54 Ministry of Health Malaysia

1  
2  
3 Jln Bangsar,  
4  
5 Kuala Lumpur, Malaysia  
6  
7

8  
9 Muslimah Yusof, MSc (Nursing)  
10  
11 Centre for Family Health Research  
12  
13  
14 Institute for Public Health  
15  
16 Ministry of Health Malaysia  
17

18 Jln Bangsar,  
19  
20  
21 Kuala Lumpur, Malaysia  
22  
23

24  
25  
26 Aznuddin Abd Razak, BSc  
27  
28 Centre for Family Health Research  
29  
30 Institute for Public Health  
31  
32 Ministry of Health Malaysia  
33

34 Jln Bangsar,  
35  
36  
37 Kuala Lumpur, Malaysia  
38  
39

40  
41 Maisarah Omar, MD  
42  
43 Centre for Family Health Research  
44  
45  
46 Institute for Public Health  
47  
48 Ministry of Health Malaysia  
49

50  
51 Jln Bangsar,  
52  
53  
54 Kuala Lumpur, Malaysia  
55  
56

1  
2  
3 Fazly Azry Abdul Aziz, MD

4  
5 Centre for Family Health Research

6  
7 Institute for Public Health

8  
9 Ministry of Health Malaysia

10  
11 Jln Bangsar,

12  
13  
14 Kuala Lumpur, Malaysia

15  
16  
17  
18 Rasidah Jamaluddin, Dip (Nursing)

19  
20 Centre for Family Health Research

21  
22 Institute for Public Health

23  
24 Ministry of Health Malaysia

25  
26 Jln Bangsar,

27  
28  
29 Kuala Lumpur, Malaysia

30  
31  
32  
33 Fatanah Ismail, MD, MPH

34  
35 Department of Public Health

36  
37 Ministry of Health Malaysia

38  
39  
40 Putrajaya, Malaysia

41  
42  
43  
44 Nurashikin Ibrahim, MBBS, MPH

45  
46 Department of Public Health

47  
48 Ministry of Health Malaysia

49  
50  
51 Putrajaya, Malaysia

1  
2  
3 Tahir Aris, MD, MPH

4  
5 Institute for Public Health

6  
7 Ministry of Health Malaysia

8  
9 Jln Bangsar,

10  
11 Kuala Lumpur, Malaysia

12  
13  
14  
15  
16  
17  
18  
19  
20  
21 **Corresponding author**

22  
23 Dr Noor Ani Ahmad

24  
25 Centre for Family Health Research

26  
27 Institute for Public Health

28  
29 Ministry of Health Malaysia

30  
31 Jln Bangsar

32  
33 50590 Kuala Lumpur

34  
35 Malaysia

36  
37 Email: [drnoorani@moh.gov.my](mailto:drnoorani@moh.gov.my)/ [dr.ani1006@gmail.com](mailto:dr.ani1006@gmail.com)

38  
39 HP: +603-22979441

40  
41 Fax: +603-22823114

42  
43  
44  
45  
46  
47  
48 **Word count: 3316**

49  
50  
51  
52  
53 **Keywords:** depression, post-partum, intimate partner violence, family support

## Postnatal depression and intimate partner violence: a nationwide clinic-based study in Malaysia

### ABSTRACT

#### Introduction

Worldwide, an estimated 13% of postnatal women are suffering from postnatal depression (PND). Other than under-privileged women, those who were exposed to violence are at higher risk of PND. This study aimed to investigate the relationship between intimate partner violence (IPV) and PND in Malaysia.

#### Methods

Randomly selected women at 6 to 16 weeks postnatal, registered at randomly selected government health clinics throughout Malaysia between June to October 2016, were invited to join this study. This survey was conducted as a nation-wide clinic-based study using cluster sampling design. PND was assessed using self-administered Edinburgh Postnatal Depression Scale (EPDS), while demographic profile and IPV was assessed using locally validated WHO Multi-country Study on Women's Health and Life Events Questionnaire, administered as face-to-face interview. EPDS score of 12 or more and/or positive for suicidal behaviour were considered as having PND.

#### Results

Out of 6669 randomly selected respondents, 5727 respondents were successfully interviewed, resulting in response rate of 85.9%. The prevalence of PND in Malaysia was 4.4% (95% CI: 2.9, 6.7). Overall prevalence of IPV was 4.9% (95% CI: 3.8, 6.4), of which 3.7%, 2.6% and 1.2% experienced psychological, physical, and sexual violence, respectively. Logistic regression analysis noted that postnatal women at risk of having depression were



1  
2  
3 those reported psychological or sexual violence, and those from low household income,  
4  
5 whose husband/partner consumed alcohol and those with lack of family support during  
6  
7 confinement.  
8

### 9 10 **Discussion and Conclusion**

11 Exposure to psychological or sexual violence was significantly associated with PND. Other  
12  
13 factors include low household income, husband/partner who consumed alcohol and lack of  
14  
15 family support. These findings highlighted the importance of screening for PND and IPV  
16  
17 during postpartum period, followed by appropriate intervention particularly for  
18  
19 underprivileged population.  
20  
21  
22  
23  
24  
25

26 **Keywords:** depression, post-partum, intimate partner violence, family support  
27  
28  
29

### 30 **Strength and limitations of this study**

- 31  
32 • Nationwide study using cluster sampling design enabled the findings of this study to  
33  
34 be generalised to Malaysian population as majority of postnatal mothers sought care  
35  
36 at government health facilities  
37  
38
- 39 • Objective assessment of the postnatal depression using locally validated self-  
40  
41 administered tool  
42  
43
- 44 • Intimate partner violence were assessed using locally validated questionnaires  
45  
46
- 47 • Postnatal depression was based on screening tool and not diagnostic  
48  
49  
50  
51  
52  
53  
54  
55  
56  
57

## INTRODUCTION

World Health Organization estimates that 13% of post-partum women experience mental disorders, particularly depression [1]. The problem was observed to be higher in developing countries, ranges from 4.9% to 50.8% among mothers four to eight weeks postpartum [2]. Among Asian women, using self-rated questionnaires, the prevalence was 23.7%, 16.5% and 17.4% at six weeks, three months, and six months after childbirth, respectively [3]. The prevalence in Malaysia varies based on the setting; 20.7% at primary care setting [4] and 31.7% at hospital setting [5].

Postnatal depression, PND, generally observed within four to six weeks after childbirth, presented with symptoms such as low mood, anhedonia, forgetfulness, irritability, anxiety, sleep disturbance, and poor functioning [6]. Various factors were found to be associated with PND. Young age, low socioeconomic status, and partner's factors such as alcoholism, uneducated, marital conflict, lack of husband's support, and psychological factors such as antenatal depression, stressful life event, and IPV were associated with PND [2, 3]. While depression at any time through out a woman's lifetime is always devastating, depression during the perinatal period; antenatal and postnatal, is of special importance and a public health concern due to its detrimental effects to women, families and their children. It may lead to serious complications such as maternal suicide, child abuse and neglect and increased risk of children's emotional and behavioural problems in later life.

Violence against women, particularly IPV is an important public health problem especially if the affected women become pregnant. IPV refers to any behaviour within an intimate relationship that causes physical, psychological or sexual harm to those in the relationship. Such behaviour includes acts of physical aggression, forced intercourse and other forms of sexual coercion and various controlling behaviours [7]. It is associated with fatal and non-fatal health effects including homicide and suicide as well as negative health behaviour during pregnancy, poor reproductive outcomes and adverse physical and mental

1  
2  
3 consequences. IPV has been described as one of the most important predictors for  
4 depression in women. A review on studies exploring the determinants of PND in South Asia  
5 noted the association with physical violence by intimate partner [8]. A household-hold  
6 survey done in Peninsular Malaysia, revealed that 7.8% of women were emotionally abused,  
7 5.0% were physically abused and 1.7% were sexually abused [9]. However, this survey only  
8 targeted adult women and not post-partum mothers.  
9  
10  
11  
12  
13  
14  
15

16 Although PND and IPV have been studied in several countries showing positive association,  
17 there is no study investigating the relationship between the two in Malaysia. Thus, this study  
18 aimed to determine the magnitude of PND in Malaysia and its associated factors, particularly  
19 IPV. Both conditions, PND and IPV, while being pressing public health concerns worldwide,  
20 are generally undetected in perinatal care services without proper screening program and  
21 intervention in place.  
22  
23  
24  
25  
26  
27  
28  
29  
30  
31  
32  
33  
34  
35  
36  
37  
38  
39  
40  
41  
42  
43  
44  
45  
46  
47  
48  
49  
50  
51  
52  
53  
54  
55  
56  
57  
58  
59  
60

## METHODS

### Study design and sampling

This cross-sectional study targeted women at six to 16 weeks postpartum, registered at government primary care clinics for postpartum care, throughout Malaysia, from June to October 2016. In Malaysia, the Ministry of Health is the main provider of perinatal healthcare services via the government primary care clinics which are available throughout Malaysia. To ensure national representativeness, cluster sampling design was used in the study. Government primary care clinics within each state, considered as cluster, were randomly selected and eligible randomly selected mothers within the clinics were considered as unit of analysis. Clinics were selected from the sampling frame of all government primary care clinics in Malaysia using systematic probability proportional to size sampling techniques.

Based on the estimated prevalence of IPV in Malaysia of 8.0% [9], sample size was calculated using a single proportion formula for the estimation of prevalence. In addition, based on the design effect of 2 and estimated non-response rate of 20%, the sample size required was 6,584 postpartum mothers.

### Questionnaire

PND was assessed using locally validated self-administered Edinburgh Postnatal Depression Scale (EPDS) [10, 11]. This scale comprises of 10 statements on common depressive symptoms and using Likert-type of responses; 0-3 scores, reflecting the severity of the symptoms. Demographic profile and IPV was assessed using locally validated WHO Multi-country Study on Women's Health and Life Events Questionnaire [9].

In assessing psychological violence, questions asked were; "At any time, has your current partner or any partner before this degraded or humiliated you in front of others?", "At anytime, has your current partner or any partner previously do things to threaten or make you

1  
2  
3 scared ( example: by the way he looks at you, shouts or break things)?“, or, “At any time,  
4 has your current partner or any partner previously treated to hurt you or somebody whom  
5 you cared about?“  
6  
7  
8  
9

10 For physical violence, questions asked were; “At any time, has your current partner or any  
11 partner before this slapped or thrown something at you that could hurt you?“, “At any time,  
12 has your current partner or any partner before this pushed or grabed you or pulled your  
13 hair?or “At any time, has your current partner or any partner previously beat you with his fist  
14 or anything else that could hurt you? “At any time, has your current partner or any partner  
15 previously kicked, dragged or beaten you?“ or “At any time, has your current partner or any  
16 partner previously choked or burnt you on purpose?“ or “At any time, has your current  
17 partner or any partner previously threatened you using a gun, knife or any other weapon?“  
18  
19  
20  
21  
22  
23  
24  
25  
26  
27

28 Questions asked for identifying sexual violence were; “At any time, has your current partner  
29 or any partner previously physically forced you to have sexual intercourse when you did not  
30 want to?“ or “Have you ever entered into an unwanted sexual relationship with your partner  
31 or any partner previously because of fear of what your partner might do?“, or “Has your  
32 partner forced you to do something sexual that you feel is degrading or humiliating?“  
33  
34  
35  
36  
37

38 This questionnaire was installed into mobile devise and administered as face-to-face  
39 interview by trained nurses. Both questionnaires were available in bilingual; *Bahasa Malaysia*  
40 and English.  
41  
42  
43  
44  
45

### 46 **Statistical analysis**

47  
48 Only data with complete responses on EPDS module was used for analysis. Data was  
49 analysed using complex sample module in the IBM Statistical Package of Social Sciences  
50 (SPSS) for Windows version 23.0 (IBM Corp., Armonk, NY, USA), taking into consideration  
51 the complexity of the sampling design. The overall prevalence of PND and its estimated  
52 population affected were determined. Bivariate analysis was done to determine the factors  
53  
54  
55  
56  
57

1  
2 associated with PND. Crude odds ratios were used to describe the strength of association  
3 between dependent and independent variables. Multivariable logistic regression model was  
4 fitted to determine the factors associated with PND. The independent variables that were  
5 included were locality, sex, ethnicity, household income, age group, ethnicity, marital status,  
6 education level, occupation, household income, partner's alcohol consumption, family  
7 support during confinement and the three types of IPV; emotional, physical and sexual  
8 violence. As the dependent variable was dichotomous, we used a logistic regression model  
9 to produce crude odds ratio as a measure of association. For the final model, FORWARD LR  
10 variable selection method was used to obtain significant variables. Only variables with  $p$ -  
11 value of less than 0.25 were included. The statistical significance of the individual regression  
12 coefficient was tested using Wald chi-square statistic. The adjusted OR, with the respective  
13 95% confidence intervals (CIs), was then calculated. A  $p$ -value of less than 0.05 was  
14 considered significant. Model fit was tested by the Hosmer-Lemeshow statistic, which should  
15 be non-significant ( $p > 0.05$ ).  
16  
17  
18  
19  
20  
21  
22  
23  
24  
25  
26  
27  
28  
29  
30  
31

### 32 **Variable definition**

33 Age was grouped into four categories; 18-24 years, 25-29 years, 30-34 years, and 35 years  
34 and more. Ethnicity was classified based on three major ethnic groups in Malaysia, namely  
35 Malay, Malaysian Chinese and Malaysia Indian, followed by 'Other Bumiputera' and 'Others'.  
36 Other Bumiputera comprised of indigenous groups, local Sabahans and Sarawakians, while  
37 'Others' were mostly foreigners, immigrants, both legal and illegal, residing in Malaysia.  
38  
39  
40  
41  
42  
43  
44  
45

46 Education levels were categorised based on the Malaysian education system. Respondents  
47 were considered as having no formal education/primary education if they had not attended  
48 any formal schooling up to those who had completed up to six years of primary school.  
49 Those who had completed 11 years of formal schooling were considered as completed  
50 secondary education, while respondents with diploma or higher qualifications were  
51  
52  
53  
54  
55  
56  
57  
58  
59  
60

1  
2  
3 considered as having completed tertiary education. Household income was calculated based  
4 on the pooled income of family members and categorised into four groups; lowest to highest.  
5  
6  
7

8  
9 PND was defined based on EPDS result. Respondent was considered as having depression  
10 based on EPDS score of 12 and/or more, positive response to the last statement on self-  
11 harming. The cut-off score was based on local validation studies [10,11].  
12  
13  
14

15  
16 For IPV, this study assessed three types of violence; psychological, physical and sexual  
17 violence. Psychological violence was defined as positive response to ever been publicly  
18 humiliated, or ever been threatened or threatened to hurt respondent or someone she cared.  
19  
20 Physical violence was considered when respondent gave positive response to history of  
21 being slapped, pushed, beaten, kicked, choked or threatened with weapon, while sexual  
22 violence was defined as positive response for any history of sexual coercion, sex out of fear,  
23 or forced to engage in degraded sexual act.  
24  
25  
26  
27  
28  
29  
30  
31  
32  
33  
34  
35  
36  
37  
38  
39  
40  
41  
42  
43  
44  
45  
46  
47  
48  
49  
50  
51  
52  
53  
54  
55  
56  
57  
58  
59  
60

## RESULTS

Out of 6639 randomly selected respondents, 5745 were successfully interviewed, resulting in response rate of 86.5%. A total of 442 respondents defaulted follow-up at the clinics, non-contactable or moved out from the clinic's operation area during their eligibility period; 6-6 weeks postpartum. Another 452 respondents refused to participate, while 18 data had incomplete EPDS (**Figure 1**). No difference was found in the characteristics of the postpartum mothers; age, ethnicity or sex, among the respondents and non-respondents. 5727 data was used in the analysis. By profiles, majority of the respondents were between the ages of 25 and 35 years. Majority of them were married, had attained at least secondary education level, and half of them were working mothers (**Table 1**).

### Prevalence of postnatal depression

Prevalence of PND among mothers 6 to 16 weeks postpartum in Malaysia was 4.4% (95% Confidence Interval, CI: 2.9, 6.7) with estimated 22,249 mothers affected. There was no difference in the prevalence of PND by different age groups. PND was higher among 'other Bumiputeras' and 'other ethnics' as compared to the Malays. Mothers who were unmarried, low education status, not working, and low household income were also observed to have higher prevalence of PND. Mothers with partners who consumed alcohol, those with unplanned pregnancy and mothers without family support during confinement were also noted to have higher prevalence of PND (**Table 2**).

### Prevalence of intimate partner violence

With regards to intimate partner violence, 4.9% of postpartum women reported IPV with 3.7%, 2.6% and 1.2% experienced psychological, physical and sexual violence, respectively. Most of the abuse happened in combination. Analysis noted that 1.7%, 0.7%, and 0.5%, reported psychological violence only, physical violence only, and sexual violence only, respectively. In this study, history of psychological, physical or sexual violence were associated with higher prevalence of PND (**Table 2**).



### Factors associated with postnatal depression

Multivariate analysis found that PND was significantly higher among mothers exposed to psychological or sexual violence; adjusted Odds Ratio, aOR: 4.41; CI: 2.47, 7.88, and aOR: 3.47; CI: 1.38, 8.76, respectively, while controlling for other variables. In addition, PND was three times higher among those with household income of less than RM1500 (aOR: 2.97; CI: 1.62, 5.46) as compared to those earned more than RM5000, 58% higher among those reported husband's alcohol consumption (aOR: 1.58; CI: 1.07, 2.34), and almost doubled among mothers without family support during confinement (aOR: 1.80; CI: 2.47, 7.88) (**Table 3**).

## DISCUSSION

To the best of our knowledge, this is the first study investigating the relationship between PND and IPV using a large number of subjects in Malaysia. This study examined the association between physical, sexual and psychological violence with PND in a population-based sample of women in Malaysia. Although various studies have explored the relationship between exposures to IPV as a whole [14, 15], this study contributes to the empirical literature by demonstrating the individual effects of each type of violence on the PND. An earlier population-based study observed that IPV is a significant public health problem in Malaysia [9], and studies on PND have also demonstrated its importance [5, 6]. Our study clearly noted the overlap between these two problems, which has implication for the planning of intervention strategies.

### Prevalence of postnatal depression

The prevalence of PND in our study of 4.4%, was lower than the earlier study conducted in Kelantan in 2000, with a prevalence of 20.3% [4]. Both studies were conducted at primary care clinics, using similar screening tool with similar cut-off score, but targeting women at different timing of postpartum. Our nation-wide study targeted women at 6 to 16 weeks postpartum while the Kelantan study targeted women at 4 to 6 weeks postpartum. The difference in the prevalence might be due to the different timing of screening. Longitudinal studies reported that the incidence rates decreased over post-partum period [12, 13]. The prevalence in this study was also lower than an earlier nation-wide household survey conducted in Malaysia, using similar screening tool and target population, with prevalence of postnatal depression of 12.7% [14]. Thus, another possible reason for the lower prevalence in this study was the reluctance to disclose their problem, possibly due to fear of being stigmatized. Study in Indonesia among women at 6 weeks postpartum, using similar cut-off score as our study, reported prevalence of 6.6%, while Singapore study among similar target group but using lower cut-off score, reported a prevalence of 6.8% [2].

### **Association between intimate partner violence and postnatal depression**

The relationship between psychological, physical and sexual violence with PND were reported in various studies [8, 17-25]. Our study found significant association between PND with psychological and sexual violence, but not physical violence. We recorded strong association between psychological violence with the occurrence of PND, even after adjustments. Our findings concur with previous studies that observed psychological violence as more common compared to physical or sexual violence [18-21]. The impact of psychological violence was also found to be strongly associated with postnatal depression, independently of physical or sexual violence [19]. Psychological violence has a negative impact on emotions and mental health of post-partum mothers and often potentially contributes to physical or sexual violence [22]. The evidence on the association between psychological violence with PND in Malaysia is very much lacking. Effect of the psychological violence might not be visible to the naked eyes but based on the current evidence, supported by our study, this factor should be taken into consideration in the planning of the intervention strategies, particularly towards the perpetrator. Perpetrator of this psychological violence might not realise the adverse effect of their actions on these post-partum mothers.

We found positive association between sexual violence and PND. A prospective study among Norwegian mothers also noted higher PND among those exposed to adult abuse including sexually abused [24]. On the other hand, a study in Bangladesh noted no significant association between sexual violence before or during pregnancy with postpartum depression [25]. Our findings revealed a possibility that women in Malaysia were more open to disclosure compared to women in Bangladesh. These mothers possibly felt trapped in their relationship and had to endure the sexual violence for the sake of their children. Most of the studies on the association between IPV and PND focused on physical violence [26-29]. These studies demonstrated strong association between history of physical violence and PND. The study in Bangladesh, evaluating the influence of physical, sexual and psychological IPV, found that only physical violence showed direct effect on PND [25]. Our

1  
2  
3 study found lower prevalence of physical violence compared to psychological violence, with  
4 no association between physical violence and PND after controlling for confounders. These  
5 findings might be due to negative attitude of society to husbands/partners who abused their  
6 wives physically, particularly during pregnancy, resulting in lower prevalence. In contrast,  
7 another possible explanation is the possibility that the women did not view the physical act of  
8 aggressions that they received, if any, as violence, due to cultural factors that view wife  
9 beating as a man's right to punish disobedient wife.  
10  
11  
12  
13  
14  
15  
16  
17

### 18 **Other factors associated with postnatal depression**

19  
20 Other than IPV, our study also noted higher odds of PND among mothers of low income  
21 families, husband who consumed alcohol and those with lack of support during confinement.  
22 Financial difficulties have been identified as risk factors for PND independent of IPV [8, 23,  
23 26]. The association between partner's substance use as in our study was also observed in  
24 the Canadian study [23]. Substance use by husbands/partners often associated with IPV  
25 against women which may give rise to the problem of PND in post-partum women [29].  
26 Family support during confinement is very important in Asian community. Our study  
27 demonstrated that lack of family support independently associated with higher odds of PND.  
28 Our findings concurred with other studies that demonstrated similar associations [8, 15, 16].  
29 A study from China concluded that lack of postnatal family support, particularly the support  
30 from husband, is an important risk factor of PND [31].  
31  
32  
33  
34  
35  
36  
37  
38  
39  
40  
41  
42  
43

### 44 **Strengths and limitations**

45  
46 The main strength of our study is the large nationally representative data with a robust  
47 method. Moreover, the response rate was quite high (85.9%) despite the sensitive nature of  
48 the issue. We also examined various socio-demographic and socio-cultural factors. Most  
49 importantly, this study used an internationally recognized tool which was locally validated  
50 with standard training given to data collectors. Another strength was the individual analysis  
51 by type of violence which is important for the planning of intervention strategies.  
52  
53  
54  
55  
56  
57

1  
2  
3 Nevertheless, our findings have several limitations. One of the limitations of this study was  
4 the cross-sectional nature of the study which prevents the determination of temporal  
5 relationship between exposure to IPV and PND. Even though a substantial number of  
6 possible confounders were adjusted in this study, some of the important variables were not  
7 controlled for, such as birth complication, child morbidity and breastfeeding. However, with all  
8 the limitations, this study was able to provide a baseline data and offers insight of the  
9 association between IPV and PND in Malaysia.  
10  
11  
12  
13  
14  
15  
16  
17  
18  
19  
20  
21  
22  
23  
24  
25  
26  
27  
28  
29  
30  
31  
32  
33  
34  
35  
36  
37  
38  
39  
40  
41  
42  
43  
44  
45  
46  
47  
48  
49  
50  
51  
52  
53  
54  
55  
56  
57  
58  
59  
60

## CONCLUSION AND POLICY IMPLICATIONS

Higher odds of PND was observed among mothers with history of psychological or sexual violence. Mothers from low income families, with husbands who consumed alcohol and those with lack of family support during confinement were more at-risk of PND. Screening for postnatal depression at primary care level should be considered, together with planning of intervention strategies specifically targeted those at-risk populations.

Pregnancy care and postnatal programmes must address issues related to PND and IPV as there is overwhelming evidence that there are adverse health effects on both mother and child. Health care personnel must be trained to be able to detect and confidently communicate regarding these issues and be aware that IPV may be a factor in some of the medical and health problems faced during and after pregnancy. There must be proper setting and facilities as well as trained personnel to provide help and proper counselling or referral. Issues pertaining to sexual and reproductive health, women's rights and violence should be incorporated into the well-established pre-marital course. Courses on family values and parenting skills for young couples and parents could be another platform to reduce IPV specifically and violence and abuse in general.

### Acknowledgement

The authors wish to thanks the Director General of Health Malaysia for his permission to publish this article. Our gratitude to the Asia Pacific International Research and Education (ASPIRE) Network for their contribution in the concept of this study.

### Authors' contribution

NAA, UAS, and TA were responsible for the study design and concept. NAA was responsible for the stdy conduct, subjects selection, study implementation, data analysis, data interpretation, drafting, critical revision and final approval of the manuscript. UAS, AR, MM

1  
2  
3 and CYY were responsible in drafting, critical revision and final approval of the manuscript.  
4  
5 NMK, MY, AAR, MO, FAAA, and RJ were responsible for subjects recruitment, data  
6  
7 collection, data entry, critical revision and final approval of the manuscript. FI and NI were  
8  
9 responsible for data interpretation, critical revision and final approval of the manuscript.  
10

## 11 12 **Funding**

13  
14 This study was supported by Ministry of Health Research Grant (NMRR-15-2404-26677).  
15  
16

## 17 18 **Competing interest statement**

19  
20 All authors declare no conflict of interest  
21  
22

## 23 24 **Patient consent**

25  
26 All respondents consented to involve in this study  
27  
28

## 29 30 **Ethics approval**

31  
32 Medical Research and Ethics Committee, Ministry of Health Malaysia  
33  
34

## 35 36 **Data sharing statement**

37  
38 Data which were used for this study is not publicly available. Data are however available  
39  
40 from the corresponding author upon reasonable request and with permission of the Director  
41  
42 General of Health Malaysia.  
43  
44  
45  
46  
47  
48  
49  
50  
51  
52  
53  
54  
55  
56  
57

**Reference:**

1. World Health Organization. Mental Health: Maternal mental health. [http://www.who.int/mental\\_health/maternal-child/maternal\\_mental\\_health/en/](http://www.who.int/mental_health/maternal-child/maternal_mental_health/en/) accessed on 15 May 2017.
2. Norhayati MN, Nik Hazlina NH, Asrene AR, wan Emilin WMA. Magnitude and risk factors for postpartum symptoms: a literature review. *Journal of Affective Disorders*. 2015;175:34-52
3. Roomruangwong C, Epperson CN. Perinatal depression in Asian women: prevalence, associated factors, and cultural aspects. *Asian Biomedicine*. 2011; 5(2):179-193.
4. Kadir AA, Nordin R, Ismail SB, Yaacob MJ, Wan Mustapha WMR. Postnatal depression in mothers attending primary care clinics in Kelantan, Malaysia. *International Medical Journal*. 2005; 12(2):105-109.
5. Ariffin Siti RM, Ahmad A, Rahman RA, Loh HS, Ng CG. Postpartum depression in Malaysian women: the association with the timing of pregnancy and sense of personal control during childbirth. *International Journal of Academic Research*. 2014; 6(3): 143-149.
6. American Psychiatric Association: *Diagnostic and statistical manual of mental disorders (5th Edition)*. Washington, DC, 2000.
7. The World Report on Violence and Health. Krug EG, Mercy JA, Dahlberg LL, Zwi AB *Lancet*. 2002 Oct 5; 360(9339):1083-8
8. Fisher J, de Mello MC, Patel A, Tran T, Holton S, Holmes W. Prevalence and determinants of common perinatal mental disorders in women in low- and lower-middle-income countries: a systematic review. *Bull World Health Organ* 2012;90:139-149G.
9. Shuib R, Endut N, Ali SH, Osman I, Abdullah S, Oon SW, Ab Ghani P, Prabakaran G, Hussin NS, Shahrudin SSH. Domestic violence and women's well-being in Malaysia: Issues and challenges in conducting a national study using the WHO multi-country



- 1  
2  
3 questionnaire on women's health and domestic violence against women. *Procedia-*  
4 *Social and Behavioural Sciences*. 2013;19:475-488.  
5  
6  
7 10. Wan Mahmud WR, Awang A, Mohamed MN. Revalidation of the Malay version of the  
8 *Edinburgh Postnatal Depression Scale (EPDS)* among Malay postpartum women  
9 attending the Bakar Bata Health Centre in Alor Setar, Kedah, North West of  
10 Peninsular Malaysia. *Malaysia Journal of Medical Sciences*. 2003; 10(2):71-75.  
11  
12  
13  
14 11. Abdul Kadir A, Nordin R, Ismail SB, Yaacob MJ, Wan Mustapha WMR. Validation of  
15 the Malay version of *Edinburgh Postnatal Depression Scale* for Postnatal women in  
16 Kelantan, Malaysia. *Asia Pacific Family Medicine*. 2004; 3(1-2):9-18.  
17  
18  
19  
20 12. Abdollahi F, Zarghami M, Azhar MZ, Sazlina SG, Lye MS. Predictors and incidence of  
21 post-partum depression: a longitudinal cohort study. *J Obstet Gynaecol Res*. 2014.  
22 Doi:10.1111/jog.12471 accessed on 3 May 2017.  
23  
24  
25  
26 13. Escriba-Aguir V, Artazcoz L. Gender differences in postpartum depression: a  
27 longitudinal cohort study. *J Epidemiol Community Health*. 2011;65:320-326.  
28  
29  
30  
31 14. Institute for Public Health (IPH), National Institutes of Health, Ministry of Health  
32 Malaysia. *National Health and Morbidity Survey (NHMS) 2016: Maternal and Child*  
33 *Health*. Vol. II: Findings. 2016.  
34  
35  
36 15. Castro F, Place JMS, Billings DL. Risk profiles associated with postnatal depressive  
37 symptoms among women in a public sector hospital in Mexico: the role of  
38 sociodemographic and psychological factors. *Arch Women Ment Health*.  
39 2015;18:463-471.  
40  
41  
42  
43  
44 16. Jones E, Coast E. Social relationships and postpartum depression in South Asia: a  
45 systematic review. *International Journal of Social Psychiatry*. 2012;59(7):690-700.  
46  
47  
48  
49 17. Howard LM, Oram S, Galley H, Trevillion K, Feder G. Domestic violence and perinatal  
50 mental disorders: a systematic review and meta-analysis. *PLOS Medicine*.  
51 2013;10(5):e1001452.  
52  
53  
54  
55  
56  
57  
58  
59  
60

- 1  
2  
3 18. Shamu S, Zarowsky C, Roelens K, Temmerman M, Abrahams N. High-frequency  
4 intimate partner violence during pregnancy, postnatal depression and suicidal  
5 tendencies in Harare, Zimbabwe. *General Hospital Psychiatry*. 2016;38:109-114.  
6  
7  
8  
9 19. Ludermir AB, Lewis G, Valongueiro SA, de Araujo TVB, Araya R. Violence against  
10 women by their intimate partner during pregnancy and postnatal depression: a  
11 prospective cohort study. *Lancet* 2010;376:903-910.  
12  
13  
14 20. Zhang Y, Zou S, Cao Y, Zhang Y. Relationship between domestic violence and  
15 postnatal depression among pregnant Chinese women. *Int J Gynaecol and*  
16 *Obstetrics*. 2012;116:26-30.  
17  
18  
19 21. Desmarais SL, Pritchard A, Lowder EM, Janssen PA. Intimate partner abuse before  
20 and during pregnancy as risk factors for postpartum mental health problems. *BMC*  
21 *Pregnancy and Childbirth*.2014;14:132  
22  
23  
24 22. Miura A, Fujiwara T. Intimate partner violence during pregnancy and postpartum  
25 depression in Japan: a cross-sectional study. *Frontiers in Public Health*. 2017;5:81.  
26  
27  
28  
29  
30  
31  
32  
33 23. Dennis CL, Vigod S. The relationship between postpartum depression, domestic  
34 violence, childhood violence, and substance use: epidemiologic study of a large  
35 community sample. *Violence Against Women*. 2013;19(4):503-517.  
36  
37  
38  
39 24. Sorbo MF, Grimstad H, Bjongaard JH, Lukasse M, Schei B. Adult physical, sexual,  
40 and emotional abuse and postpartum depression, a population based, prospective  
41 study of 53,065 women in the Norwegian Mother and Child Cohort Study. *BMC*  
42 *Pregnancy and Childbirth*. 2014;14:316. [http://www.biomedcentral.com/147-](http://www.biomedcentral.com/147-2393/14/316)  
43  
44  
45  
46  
47  
48  
49 25. Islam MH, Broidy L, Baird K, Mazerolle P. Intimate partner violence around the time of  
50 pregnancy and postpartum depression: the experience of women of Banfladesh. *PLoS*  
51 *ONE*. 2017;12(5):e0176211. <http://doi.org/10.1371/journal.pone.0176211>. Accessed  
52  
53  
54  
55  
56  
57  
58  
59  
60 on 7 July 2017.

- 1  
2  
3 26. Nasreen HE, Edhborg M, Petzold M, Forsell Y, Kabir ZN. Incidence and risk factors of  
4 postpartum depressive symptoms in women: a population-based prospective cohort  
5 study in a rural district in Bangladesh. *J Depress Anxiety*. 2015;4:2.  
6 <http://dx.doi.org/10.4172/2167-1044.1000180> accessed on 5 May 2017.  
7  
8  
9  
10 27. Gaillard A, Strat YL, Mandelbrot L, Keita H. Predictors of postpartum depression:  
11 prospective study of 264 women followed during pregnancy and postpartum.  
12 *Psychiatry Research*. 2014;215:341-346.  
13  
14 28. Nongrum R, Thomas E, Lionel J, Jacob KS. Domestic violence as a risk factor for  
15 maternal depression and neonatal outcomes: a hospital-based cohort study. *Indian J*  
16 *Pstchol Med*. 2014;36(2):179-181.  
17  
18 29. Khalifa DS, Glavin K, Bjertness E, Lien L. Determinants of postnatal depression in  
19 Sudanese women at 3 months postpartum: a cross-sectional study. *BMJ Open*.  
20 2016;6:e009443.doi:10.1136/bmjopen-2015-009443. Accessed on 7 July 2017  
21  
22 30. Ali NS, Ali FN, Khuwaja AK, Nanji K. Factors associated with intimate partner  
23 violence against women in a mega city of South-Asia: multi-centre cross-sectional  
24 study. *Hong Kong Medical Journal*. 2014;20(4):297-303.  
25  
26 30. Xie RH, Yang JZ, Liao SP, Xie HY, Walker M, Wen SW. Prenatal family support,  
27 postnatal family support and postpartum depression. *Australian and New Zealand*  
28 *Journal of Obstetrics and Gynaecology*. 2010;50:340-345.  
29  
30  
31  
32  
33  
34  
35  
36  
37  
38  
39  
40  
41  
42  
43  
44  
45  
46  
47  
48  
49  
50  
51  
52  
53  
54  
55  
56  
57  
58  
59  
60

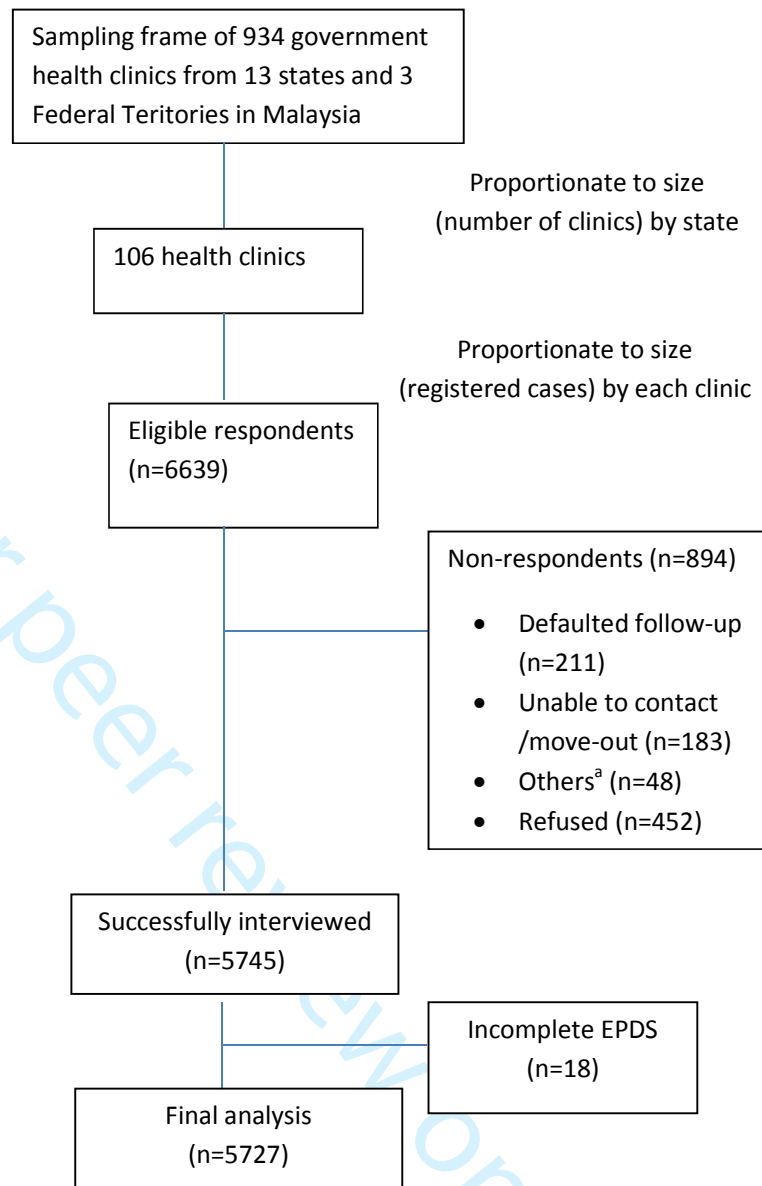

<sup>a</sup>Others include communication/language barriers or duplicated name in the database

**Figure 1** Flow diagram of respondents recruitment

40  
41  
42  
43  
44  
45  
46  
47  
48  
49  
50  
51  
52  
53  
54  
55  
56  
57  
58  
59  
60

**Table 1: Sociodemographic profile of respondents (n=5727)**

|                                | Unweighted count | Percentage (%) |
|--------------------------------|------------------|----------------|
| <b>Age</b>                     |                  |                |
| 18-24                          | 1043             | 18.2           |
| 25-29                          | 1842             | 32.2           |
| 30-34                          | 1749             | 30.5           |
| 35 and above                   | 1093             | 19.1           |
| <b>Ethnic</b>                  |                  |                |
| Malay                          | 3889             | 67.9           |
| Chinese                        | 549              | 9.6            |
| Indians                        | 262              | 4.6            |
| Other Bumis                    | 753              | 13.1           |
| Others                         | 274              | 4.8            |
| <b>Marital Status</b>          |                  |                |
| Married/have partner           | 5654             | 98.7           |
| Not married/no current partner | 73               | 1.3            |
| <b>Education status</b>        |                  |                |
| No formal/ Primary             | 382              | 7.2            |
| Secondary                      | 3300             | 60.0           |
| Tertiary                       | 2045             | 32.8           |
| <b>Occupation</b>              |                  |                |
| Working                        | 2807             | 49.0           |
| Not working/ Housewife         | 2920             | 51.0           |
| <b>Household income*</b>       |                  |                |
| Less than RM1500               | 1575             | 27.5           |
| RM1501-RM3000                  | 1879             | 32.8           |

|    |                 |      |      |
|----|-----------------|------|------|
| 1  |                 |      |      |
| 2  |                 |      |      |
| 3  | RM3001-RM5000   | 1308 | 22.9 |
| 4  |                 |      |      |
| 5  | RM5001 and more | 958  | 16.7 |
| 6  | <hr/>           |      |      |
| 7  | *missing data=7 |      |      |
| 8  |                 |      |      |
| 9  |                 |      |      |
| 10 |                 |      |      |
| 11 |                 |      |      |
| 12 |                 |      |      |
| 13 |                 |      |      |
| 14 |                 |      |      |
| 15 |                 |      |      |
| 16 |                 |      |      |
| 17 |                 |      |      |
| 18 |                 |      |      |
| 19 |                 |      |      |
| 20 |                 |      |      |
| 21 |                 |      |      |
| 22 |                 |      |      |
| 23 |                 |      |      |
| 24 |                 |      |      |
| 25 |                 |      |      |
| 26 |                 |      |      |
| 27 |                 |      |      |
| 28 |                 |      |      |
| 29 |                 |      |      |
| 30 |                 |      |      |
| 31 |                 |      |      |
| 32 |                 |      |      |
| 33 |                 |      |      |
| 34 |                 |      |      |
| 35 |                 |      |      |
| 36 |                 |      |      |
| 37 |                 |      |      |
| 38 |                 |      |      |
| 39 |                 |      |      |
| 40 |                 |      |      |
| 41 |                 |      |      |
| 42 |                 |      |      |
| 43 |                 |      |      |
| 44 |                 |      |      |
| 45 |                 |      |      |
| 46 |                 |      |      |
| 47 |                 |      |      |
| 48 |                 |      |      |
| 49 |                 |      |      |
| 50 |                 |      |      |
| 51 |                 |      |      |
| 52 |                 |      |      |
| 53 |                 |      |      |
| 54 |                 |      |      |
| 55 |                 |      |      |
| 56 |                 |      |      |
| 57 |                 |      |      |
| 58 |                 |      |      |
| 59 |                 |      |      |
| 60 |                 |      |      |

For peer review only

**Table 2: Factors associated with postnatal depression (n=5727)**

| Variables                  |                              | Prevalence<br>(95% CI) | Crude OR<br>(95% CI) |
|----------------------------|------------------------------|------------------------|----------------------|
| Age-group<br>(years)       | 18-24                        | 6.9 (3.8, 12.4)        | 1.49 (0.96, 2.13)    |
|                            | 25-29                        | 4.6 (3.0, 7.2)         | 0.93 (0.63, 1.37)    |
|                            | 30-34                        | 3.1 (1.9, 4.8)         | 0.69 (0.45, 1.04)    |
|                            | 35 and above                 | 4.0 (2.2, 7.1)         | R                    |
| Ethnicity                  | Malay                        | 3.7 (2.5, 5.5)         | R                    |
|                            | Chinese                      | 1.7 (0.8, 3.7)         | 0.69 (0.38, 1.26)    |
|                            | Indian                       | 4.5 (2.0, 9.7)         | 1.48 (0.81, 2.72)    |
|                            | Other Bumiputera             | 9.1 (3.6, 20.9)        | 2.63 (1.90, 3.62)    |
|                            | Others                       | 5.1 (2.3, 10.5)        | 1.92 (1.12, 3.27)    |
| Marital Status             | Married/Have partner         | 4.2 (2.7, 6.5)         | R                    |
|                            | Unmarried/no current partner | 17.6 (7.1, 37.5)       | 3.14 (1.49, 6.64)    |
| Education level            | No formal/Primary education  | 8.9 (3.5, 20.9)        | 2.46 (1.53, 3.95)    |
|                            | Secondary education          | 4.7 (3.1, 6.9)         | 1.45 (1.06, 1.97)    |
|                            | Tertiary education           | 2.9 (1.8, 4.6)         | R                    |
| Occupation                 | Working                      | 2.5 (1.5, 4.1)         | R                    |
|                            | Not working/housewife        | 6.1 (3.9, 9.5)         | 1.88 (1.42, 2.49)    |
| Household income           | Lower than RM1500            | 8.5 (5.0, 13.9)        | 3.75 (2.29, 6.14)    |
|                            | RM1500-RM3000                | 3.4 (2.3, 5.0)         | 1.74 (1.04, 2.93)    |
|                            | RM3001-RM5000                | 2.2 (1.2, 3.9)         | 1.00 (0.55, 1.82)    |
|                            | RM5001 and more              |                        | R                    |
| Partner's alcohol consumed | Yes                          | 5.6 (3.3, 9.4)         | 1.71 (1.20, 2.42)    |
|                            | No                           | 3.5 (2.2, 5.5)         | R                    |

|                                   |     |                   |                     |
|-----------------------------------|-----|-------------------|---------------------|
| Unplanned pregnancy               | Yes | 11.5 (5.6, 22.2)  | 4.19 (3.10-5.67)    |
|                                   | No  | 2.7 (1.7, 4.1)    | R                   |
| Family support during confinement | Yes | 3.8 (2.5, 5.7)    | R                   |
|                                   | No  | 10.8 (6.2, 18.1)  | 2.80 (1.96, 3.99)   |
| Psychological violence            | Yes | 27.1 (18.1, 38.4) | 8.94 (6.21, 12.87)  |
|                                   | No  | 3.5 (2.2, 5.8)    | R                   |
| Physical violence                 | Yes | 29.7 (19.4, 42.6) | 7.50 (4.75, 11.83)  |
|                                   | No  | 3.7 (2.3, 6.0)    | R                   |
| Sexual violence                   | Yes | 43.8 (27.9, 61.1) | 15.10 (8.91, 25.60) |
|                                   | No  | 3.9 (2.4, 6.2)    | R                   |

---

CI= Confidence interval, OR= Odds Ratio



**Table 3: Multivariate analysis on factors associated with postnatal depression  
(n=5727)**

| Variables                            |                   | Wald   | Adjusted OR<br>(95% CI) | p value |
|--------------------------------------|-------------------|--------|-------------------------|---------|
| Household income                     | Lower than RM1500 | 12.361 | 2.97 (1.62, 5.46)       | <0.001  |
|                                      | RM1500-RM3000     | 3.556  | 1.83 (0.98, 3.42)       | 0.06    |
|                                      | RM3001-RM5000     | 0.028  | 1.06 (0.52, 2.18)       | 0.87    |
|                                      | RM5001 and more   |        | R                       |         |
| Husband<br>consumed alcohol          | Yes               | 5.251  | 1.58 (1.07, 2.34)       | 0.02    |
|                                      | No                |        | R                       |         |
| Family support during<br>confinement | Yes               |        | R                       |         |
|                                      | No                | 6.01   | 1.80 (1.13, 2.87)       | 0.01    |
| Psychological violence               | Yes               | 25.14  | 4.41 (2.47, 7.88)       | <0.001  |
|                                      | No                |        | R                       |         |
| Sexual violence                      | Yes               | 6.96   | 3.47 (1.38, 8.76)       | 0.01    |
|                                      | No                |        | R                       |         |

CI= Confidence interval, OR= Odds Ratio,

Controlled for age, marital status, education level, occupation, ethnic

**STROBE 2007 (v4) Statement—Checklist of items that should be included in reports of *cross-sectional studies***

| Section/Topic                | Item # | Recommendation                                                                                                                                                                       | Reported on page # |
|------------------------------|--------|--------------------------------------------------------------------------------------------------------------------------------------------------------------------------------------|--------------------|
| Title and abstract           | 1      | (a) Indicate the study's design with a commonly used term in the title or the abstract                                                                                               | 6                  |
|                              |        | (b) Provide in the abstract an informative and balanced summary of what was done and what was found                                                                                  | 6-7                |
| <b>Introduction</b>          |        |                                                                                                                                                                                      |                    |
| Background/rationale         | 2      | Explain the scientific background and rationale for the investigation being reported                                                                                                 | 8-9                |
| Objectives                   | 3      | State specific objectives, including any prespecified hypotheses                                                                                                                     | 9                  |
| <b>Methods</b>               |        |                                                                                                                                                                                      |                    |
| Study design                 | 4      | Present key elements of study design early in the paper                                                                                                                              | 10                 |
| Setting                      | 5      | Describe the setting, locations, and relevant dates, including periods of recruitment, exposure, follow-up, and data collection                                                      | 10                 |
| Participants                 | 6      | (a) Give the eligibility criteria, and the sources and methods of selection of participants                                                                                          | 10                 |
| Variables                    | 7      | Clearly define all outcomes, exposures, predictors, potential confounders, and effect modifiers. Give diagnostic criteria, if applicable                                             | 10-11              |
| Data sources/<br>measurement | 8*     | For each variable of interest, give sources of data and details of methods of assessment (measurement). Describe comparability of assessment methods if there is more than one group | 12-13              |
| Bias                         | 9      | Describe any efforts to address potential sources of bias                                                                                                                            | 12                 |
| Study size                   | 10     | Explain how the study size was arrived at                                                                                                                                            | 10                 |
| Quantitative variables       | 11     | Explain how quantitative variables were handled in the analyses. If applicable, describe which groupings were chosen and why                                                         | 12-13              |
| Statistical methods          | 12     | (a) Describe all statistical methods, including those used to control for confounding                                                                                                | 11-12              |
|                              |        | (b) Describe any methods used to examine subgroups and interactions                                                                                                                  | 11-12              |
|                              |        | (c) Explain how missing data were addressed                                                                                                                                          | 11                 |
|                              |        | (d) If applicable, describe analytical methods taking account of sampling strategy                                                                                                   | 12                 |
|                              |        | (e) Describe any sensitivity analyses                                                                                                                                                | NA                 |
| <b>Results</b>               |        |                                                                                                                                                                                      |                    |

|                          |     |                                                                                                                                                                                                              |       |
|--------------------------|-----|--------------------------------------------------------------------------------------------------------------------------------------------------------------------------------------------------------------|-------|
| Participants             | 13* | (a) Report numbers of individuals at each stage of study—eg numbers potentially eligible, examined for eligibility, confirmed eligible, included in the study, completing follow-up, and analysed            | 14    |
|                          |     | (b) Give reasons for non-participation at each stage                                                                                                                                                         | 14    |
|                          |     | (c) Consider use of a flow diagram                                                                                                                                                                           | 14    |
| Descriptive data         | 14* | (a) Give characteristics of study participants (eg demographic, clinical, social) and information on exposures and potential confounders                                                                     | 14    |
|                          |     | (b) Indicate number of participants with missing data for each variable of interest                                                                                                                          | 14    |
| Outcome data             | 15* | Report numbers of outcome events or summary measures                                                                                                                                                         | 14    |
| Main results             | 16  | (a) Give unadjusted estimates and, if applicable, confounder-adjusted estimates and their precision (eg, 95% confidence interval). Make clear which confounders were adjusted for and why they were included | 15    |
|                          |     | (b) Report category boundaries when continuous variables were categorized                                                                                                                                    | NA    |
|                          |     | (c) If relevant, consider translating estimates of relative risk into absolute risk for a meaningful time period                                                                                             | NA    |
| Other analyses           | 17  | Report other analyses done—eg analyses of subgroups and interactions, and sensitivity analyses                                                                                                               | NA    |
| <b>Discussion</b>        |     |                                                                                                                                                                                                              |       |
| Key results              | 18  | Summarise key results with reference to study objectives                                                                                                                                                     | 16    |
| Limitations              | 19  | Discuss limitations of the study, taking into account sources of potential bias or imprecision. Discuss both direction and magnitude of any potential bias                                                   | 18-19 |
| Interpretation           | 20  | Give a cautious overall interpretation of results considering objectives, limitations, multiplicity of analyses, results from similar studies, and other relevant evidence                                   | 16-18 |
| Generalisability         | 21  | Discuss the generalisability (external validity) of the study results                                                                                                                                        | 18    |
| <b>Other information</b> |     |                                                                                                                                                                                                              |       |
| Funding                  | 22  | Give the source of funding and the role of the funders for the present study and, if applicable, for the original study on which the present article is based                                                | 21    |

\*Give information separately for cases and controls in case-control studies and, if applicable, for exposed and unexposed groups in cohort and cross-sectional studies.

**Note:** An Explanation and Elaboration article discusses each checklist item and gives methodological background and published examples of transparent reporting. The STROBE checklist is best used in conjunction with this article (freely available on the Web sites of PLoS Medicine at <http://www.plosmedicine.org/>, Annals of Internal Medicine at <http://www.annals.org/>, and Epidemiology at <http://www.epidem.com/>). Information on the STROBE Initiative is available at [www.strobe-statement.org](http://www.strobe-statement.org).

# BMJ Open

## Postnatal depression and intimate partner violence: a nationwide clinic-based cross-sectional study in Malaysia

|                                 |                                                                                                                                                                                                                                                                                                                                                                                                                                                                                                                                                                                                                                                                                                                                                                                                                                                                                                                                                                                                                                                                                                                                          |
|---------------------------------|------------------------------------------------------------------------------------------------------------------------------------------------------------------------------------------------------------------------------------------------------------------------------------------------------------------------------------------------------------------------------------------------------------------------------------------------------------------------------------------------------------------------------------------------------------------------------------------------------------------------------------------------------------------------------------------------------------------------------------------------------------------------------------------------------------------------------------------------------------------------------------------------------------------------------------------------------------------------------------------------------------------------------------------------------------------------------------------------------------------------------------------|
| Journal:                        | <i>BMJ Open</i>                                                                                                                                                                                                                                                                                                                                                                                                                                                                                                                                                                                                                                                                                                                                                                                                                                                                                                                                                                                                                                                                                                                          |
| Manuscript ID                   | bmjopen-2017-020649.R1                                                                                                                                                                                                                                                                                                                                                                                                                                                                                                                                                                                                                                                                                                                                                                                                                                                                                                                                                                                                                                                                                                                   |
| Article Type:                   | Research                                                                                                                                                                                                                                                                                                                                                                                                                                                                                                                                                                                                                                                                                                                                                                                                                                                                                                                                                                                                                                                                                                                                 |
| Date Submitted by the Author:   | 14-Feb-2018                                                                                                                                                                                                                                                                                                                                                                                                                                                                                                                                                                                                                                                                                                                                                                                                                                                                                                                                                                                                                                                                                                                              |
| Complete List of Authors:       | Ahmad, Noor Ani; Institute for Public Health, National Institutes of Health, Ministry of Health Malaysia<br>Silim, Umi Adzlin ; Hospital Kuala Lumpur, Ministry of Health Malaysia<br>Rosman, Azriman; Department of Public Health, Ministry of Health Malaysia<br>Mohamad, Majdah ; Department of Public Health, Ministry of Health Malaysia<br>Chan, Ying Ying; Institute for Public Health, Ministry of Health Malaysia<br>Mohd Kasim, Noraidda; Institute for Public Health, Ministry of Health Malaysia<br>Yusof, Muslimah; Institute for Public Health, Ministry of Health Malaysia<br>Abdul Razak, Aznuddin; Institute for Public Health, Ministry of Health Malaysia<br>Omar, Maisarah; Institute for Public Health, Ministry of Health Malaysia<br>Abdul Aziz, Fazly Azry; Institute for Public health, Ministry of Health Malaysia<br>Jamaluddin, Rasidah; institute for Public Health, Ministry of Health Malaysia<br>Ismail, Fatanah; Department of Public Health, Ministry of Health Malaysia<br>Ibrahim, Nurashikin; Department of Public Health, Ministry of Health Malaysia<br>Aris, Tahir; Institute for Public Health, |
| <b>Primary Subject Heading</b>: | Mental health                                                                                                                                                                                                                                                                                                                                                                                                                                                                                                                                                                                                                                                                                                                                                                                                                                                                                                                                                                                                                                                                                                                            |
| Secondary Subject Heading:      | Public health                                                                                                                                                                                                                                                                                                                                                                                                                                                                                                                                                                                                                                                                                                                                                                                                                                                                                                                                                                                                                                                                                                                            |
| Keywords:                       | MENTAL HEALTH, Depression & mood disorders < PSYCHIATRY, EPIDEMIOLOGY                                                                                                                                                                                                                                                                                                                                                                                                                                                                                                                                                                                                                                                                                                                                                                                                                                                                                                                                                                                                                                                                    |
|                                 |                                                                                                                                                                                                                                                                                                                                                                                                                                                                                                                                                                                                                                                                                                                                                                                                                                                                                                                                                                                                                                                                                                                                          |

SCHOLARONE™  
Manuscripts

1  
2  
3 **Postnatal depression and intimate partner violence: a nationwide clinic-based cross-**  
4 **sectional study in Malaysia**  
5  
6  
7  
8

9 Noor Ani Ahmad,<sup>1</sup> Umi Adzlin Silim,<sup>2</sup> Azriman Rosman,<sup>3</sup> Majdah Mohamad,<sup>3</sup> Chan Ying Ying,<sup>1</sup>  
10 Noraida Mohd Kasim,<sup>1</sup> Muslimah Yusof,<sup>1</sup> Aznuddin Abd Razak,<sup>1</sup> Maisarah Omar,<sup>1</sup> Fazly Azry  
11 Abd Aziz,<sup>1</sup> Rasidah Jamaludin,<sup>1</sup> Fatanah Ismail,<sup>3</sup> Nurashikin Ibrahim,<sup>3</sup> Tahir Aris.<sup>1</sup>  
12  
13  
14  
15  
16  
17  
18

19 <sup>1</sup>Institute for Public Health, Ministry of Health Malaysia  
20

21 <sup>2</sup>Hospital Kuala Lumpur, Ministry of Health Malaysia  
22

23 <sup>3</sup>Public Health Department, Ministry of Health Malaysia  
24  
25  
26  
27  
28  
29  
30  
31  
32

33 **List of Authors**  
34  
35  
36

37 Noor Ani Ahmad, MBBS, MPH  
38

39 Centre for Family Health Research  
40

41 Institute for Public Health  
42

43 Ministry of Health Malaysia  
44

45 Jln Bangsar,  
46

47 Kuala Lumpur, Malaysia  
48  
49  
50  
51  
52

53 Umi Adzlin Silim, MD, Mmed (Psychiatry)  
54

55 Department of Psychiatry  
56  
57  
58  
59  
60

1  
2  
3 Hospital Kuala Lumpur

4  
5 Kuala Lumpur, Malaysia

6  
7  
8  
9 Azriman Rosman, MBBS, MPH

10  
11 Department of Public Health

12  
13 Ministry of Health Malaysia

14  
15 Putrajaya, Malaysia

16  
17  
18  
19  
20  
21 Majdah Mohamad, MD, MPH

22  
23 Department of Public Health

24  
25 Ministry of Health Malaysia

26  
27 Putrajaya, Malaysia

28  
29  
30  
31  
32 Chan Ying Ying (MMedSc)

33  
34 Centre for Family Health Research

35  
36 Institute for Public Health

37  
38 Ministry of Health Malaysia

39  
40  
41 Jln Bangsar,

42  
43 Kuala Lumpur, Malaysia

44  
45  
46  
47  
48 Noraida Mohd Kasim, MSc (Nursing)

49  
50 Centre for Family Health Research

51  
52 Institute for Public Health

53  
54  
55 Ministry of Health Malaysia

1  
2  
3 Jln Bangsar,  
4  
5 Kuala Lumpur, Malaysia  
6  
7

8  
9 Muslimah Yusof, MSc (Nursing)  
10  
11 Centre for Family Health Research  
12  
13 Institute for Public Health  
14  
15 Ministry of Health Malaysia  
16

17  
18 Jln Bangsar,  
19  
20 Kuala Lumpur, Malaysia  
21  
22  
23

24  
25 Aznuddin Abd Razak, BSc  
26  
27 Centre for Family Health Research  
28  
29 Institute for Public Health  
30  
31 Ministry of Health Malaysia  
32  
33

34  
35 Jln Bangsar,  
36  
37 Kuala Lumpur, Malaysia  
38  
39  
40

41  
42 Maisarah Omar, MD  
43  
44 Centre for Family Health Research  
45  
46 Institute for Public Health  
47  
48 Ministry of Health Malaysia  
49

50  
51 Jln Bangsar,  
52  
53 Kuala Lumpur, Malaysia  
54  
55  
56  
57

1  
2  
3 Fazly Azry Abdul Aziz, MD

4  
5 Centre for Family Health Research

6  
7 Institute for Public Health

8  
9  
10 Ministry of Health Malaysia

11  
12 Jln Bangsar,

13  
14 Kuala Lumpur, Malaysia

15  
16  
17  
18 Rasidah Jamaluddin, Dip (Nursing)

19  
20  
21 Centre for Family Health Research

22  
23 Institute for Public Health

24  
25  
26 Ministry of Health Malaysia

27  
28 Jln Bangsar,

29  
30 Kuala Lumpur, Malaysia

31  
32  
33  
34 Fatanah Ismail, MD, MPH

35  
36  
37 Department of Public Health

38  
39  
40 Ministry of Health Malaysia

41  
42 Putrajaya, Malaysia

43  
44  
45  
46 Nurashikin Ibrahim, MBBS, MPH

47  
48  
49 Department of Public Health

50  
51  
52 Ministry of Health Malaysia

53  
54 Putrajaya, Malaysia



1  
2  
3 Tahir Aris, MD, MPH

4  
5 Institute for Public Health

6  
7 Ministry of Health Malaysia

8  
9 Jln Bangsar,

10  
11 Kuala Lumpur, Malaysia

12  
13  
14  
15  
16  
17  
18  
19  
20  
21 **Corresponding author**

22  
23 Dr Noor Ani Ahmad

24  
25 Centre for Family Health Research

26  
27 Institute for Public Health

28  
29 Ministry of Health Malaysia

30  
31 Jln Bangsar

32  
33 50590 Kuala Lumpur

34  
35 Malaysia

36  
37 Email: [drnoorani@moh.gov.my](mailto:drnoorani@moh.gov.my)/ [dr.ani1006@gmail.com](mailto:dr.ani1006@gmail.com)

38  
39 HP: +603-22979441

40  
41 Fax: +603-22823114

42  
43  
44  
45  
46  
47  
48 **Word count: 4020**

49  
50  
51  
52  
53 **Keywords:** depression, postpartum, intimate partner violence, family support

1  
2  
3 **Postnatal depression and intimate partner violence: a nationwide clinic-based cross-**  
4 **sectional study in Malaysia**  
5  
6  
7  
8

9  
10 **ABSTRACT**

11 **Introduction**

12  
13  
14 Worldwide, an estimated 13% of women in postnatal period are suffering from postnatal  
15 depression (PND). Other than under-privileged women, those who were exposed to violence  
16 are at higher risk of PND. This study aimed to investigate the relationship between intimate  
17 partner violence (IPV) and PND in Malaysia.  
18  
19  
20  
21  
22

23 **Methods**

24  
25 Randomly selected women at 6-16 weeks postnatal, registered at randomly selected  
26 government health clinics throughout Malaysia between June and October 2016, were  
27 invited to join this study. This survey was conducted as a nationwide clinic-based cross-  
28 sectional study using cluster sampling design. Probable PND was assessed using self-  
29 administered Edinburgh Postnatal Depression Scale (EPDS), while demographic profile and  
30 IPV was assessed using locally validated WHO Multi-country Study on Women's Health and  
31 Life Events Questionnaire via face-to-face interview. An EPDS total score of 12 or more  
32 and/or a positive tendency to self-harm were considered as having PND.  
33  
34  
35  
36  
37  
38  
39  
40  
41  
42  
43

44 **Results**

45  
46 Out of 6669, 5727 respondents were successfully interviewed with response rate of 85.9%.  
47  
48 The prevalence of probable PND was 4.4% (95%CI: 2.9, 6.7). Overall prevalence of IPV was  
49 4.9% (3.8, 6.4), of which 3.7% (95%CI: 2.7, 5.0), 2.6% (95%CI: 1.9, 3.5), and 1.2% (95%CI: 0.9,  
50 1.7), experienced psychological, physical, and sexual violence, respectively. Logistic  
51 regression analysis revealed that women who exposed to IPV were 2.3 times higher risk for  
52  
53  
54  
55  
56  
57  
58  
59  
60

1  
2  
3 probable PND; adjusted OR, aOR: 2.34 (95%CI: 1.12, 4.87). Other factors were those  
4  
5 reported emotional violence (aOR: 3.79, 95%CI: 1.93, 7.45), unplanned pregnancy (aOR:  
6  
7 3.32, 95%CI: 2.35, 4.69), lack of family support during confinement (aOR: 1.79, 95%CI: 1.12,  
8  
9 2.87), partner's consumed alcohol (aOR: 1.59, 95%CI: 1.07, 2.35) and those from low  
10  
11 household income (aOR: 2.99; 95%CI: 1.63, 5.49).  
12  
13

### 14 **Conclusions**

15  
16 Exposure to IPV was significantly associated with probable PND. Other factors include  
17  
18 emotional violence, unplanned pregnancy, lack of family support, partner's consumed  
19  
20 alcohol and low household income.  
21  
22

23  
24  
25  
26 **Keywords:** depression, postpartum, intimate partner violence, family support  
27  
28  
29

### 30 **Strength and limitations of this study**

- 31  
32
- 33 • Nationwide study using cluster sampling design enabled the findings of this study to  
34 be generalised to Malaysian population as majority of postnatal mothers sought care  
35 at government health facilities  
36  
37
  - 38 • Objective assessment of the probable postnatal depression using locally validated  
39 self-administered EPDS  
40  
41
  - 42 • Intimate partner violence, IPV, were assessed using locally validated questionnaires  
43  
44
  - 45 • Postnatal depression was based on screening tool and not diagnostic  
46  
47  
48  
49  
50  
51  
52  
53  
54  
55  
56  
57

## INTRODUCTION

The World Health Organization estimated that 13% of women in postpartum period experience mental disorders, particularly depression [1]. The problem was observed to be higher in developing countries, ranges from 4.9% to 50.8% among mothers at four to eight weeks postpartum [2]. Among Asian women, using self-rated questionnaires, the prevalence was 23.7%, 16.5% and 17.4% at six weeks, three months, and six months after childbirth, respectively [3]. The prevalence in Malaysia varies based on the setting; 20.7% at primary care setting [4] and 31.7% at hospital setting [5].

Postnatal depression (PND) generally occurs within four to six weeks after childbirth, presented with symptoms such as low mood, anhedonia, forgetfulness, irritability, anxiety, sleep disturbance, and poor functioning [6]. Various factors were found to be associated with PND. Young age, low socioeconomic status, and partner's factors such as alcoholism, uneducated, marital conflict, lack of husband's support, and psychological factors such as antenatal depression, stressful life event, and IPV were associated with PND [2, 3]. While depression at any time throughout a woman's lifetime is always devastating, depression during the perinatal, antenatal and postnatal periods, is of special importance and a public health concern due to its detrimental effects to women, families and their children. It may lead to serious complications such as maternal suicide, child abuse and neglect and increased risk of children's emotional and behavioural problems in later life [7-10].

Intimate partner violence (IPV) refers to any behaviour within an intimate relationship that causes physical, psychological or sexual harm to those in the relationship. Such behaviour includes acts of physical aggression, forced intercourse and other forms of sexual coercion and various controlling behaviours [11]. It is associated with fatal and non-fatal health effects including homicide and suicide as well as negative health behaviour during pregnancy, poor reproductive outcomes and adverse physical and mental consequences [12]. IPV has been described as one of the most important predictors for depression in women. A review on

1  
2  
3 studies exploring the determinants of PND in low- and lower-middle-income countries  
4 indicated an association with physical violence by intimate partner [13]. A household survey  
5 done in Peninsular Malaysia, revealed that 7.8% of women were emotionally abused, 5.0%  
6 were physically abused and 1.7% were sexually abused [14]. However, this survey only  
7 targeted adult women and not women in postpartum period.  
8  
9  
10  
11

12  
13  
14 With regards to the conceptual framework, a theoretical and conceptual model, which  
15 describes the hierarchical relationship between postnatal depression and risk factors is  
16 suitable for an epidemiological study. This framework divides levels of determinants into  
17 three; proximal, intermediate and distal [15].  
18  
19  
20  
21  
22

23  
24 [INSERT FIGURE 1]  
25  
26  
27

28 Other than proximal determinants such as violence and controlling behaviour by partner,  
29 intermediate determinants encompass partner and family factors, including the role of family  
30 support during confinement (**Figure 1**). 'Confinement' is widely practiced among women after  
31 giving birth regardless of the socio-demographic and cultural differences in Malaysia, due to  
32 the beliefs of its beneficial effect to women's wellbeing [16]. During this period, family support  
33 by keeping company and care for the mother, is crucial and this may be the key protective  
34 element against postnatal depression rather than the rituals itself [16, 17].  
35  
36  
37  
38  
39  
40  
41  
42  
43

44 Although PND and IPV have been studied in several countries showing positive association,  
45 there is no study investigating the relationship between the two in Malaysia. Thus, this study  
46 aimed to determine the magnitude of PND in Malaysia and its associated factors, particularly  
47 IPV. Both conditions, PND and IPV, while being pressing public health concerns worldwide,  
48 are generally undetected in perinatal care services without proper screening program and  
49 intervention in place.  
50  
51  
52  
53  
54  
55  
56  
57

## METHODS

### Study design

This study was a nationwide clinic-based cross-sectional study. To ensure national representativeness, cluster sampling design was employed.

### Setting

The study was conducted at the Maternal and Child Health Unit at the government primary care clinics throughout Malaysia. Malaysia operates a dichotomous system; public and private sector, with the Ministry of Health as the main provider of health care services. Health facilities are well distributed with a mean distance of 8.4 km [18]. Majority (98.2%) of women consulted one-month postnatal care, with more than 80% of the children received primary vaccination at these government primary care clinics [19].

### Participants

Women at 6-16 weeks postpartum and registered at the government primary care clinics for postnatal care and/or child immunisation were eligible to be included in the sampling frame. Women who did not register and/or unable to communicate in either English or *Bahasa Malaysia* were considered as not eligible.

### Recruitment strategies

Sampling was done by the resident statistician who was not directly involved in this study, using two-stage random sampling design. In the first stage, sampling frame of all government primary care clinics in Malaysia was used. These clinics, considered as cluster, were then randomly selected using systematic probability proportionate to size sampling techniques. For the second stage, women at 6-16 weeks postpartum, registered for postnatal care and/or child immunisation at the randomly selected clinics, and given appointment for consultation from 1 June to 30 October 2016, were listed to form a sampling frame. Number of women

1  
2  
3 selected per state was then determined proportionate to the number of registered women.  
4  
5 The clinic-based cards containing the women's profile and the appointment date were  
6  
7 extracted and tagged to indicate eligible respondents.  
8  
9

10  
11 The women were invited to join the study on the day of the appointment date. The women  
12  
13 were given Information Sheet and Consent Form by the trained nurses at the registration  
14  
15 counter. Those who consented to involve in the study were called into a private room within  
16  
17 the clinic, without their partner, and were then given the self-administered screening form,  
18  
19 Edinburgh Postnatal Depression Scale (EPDS), for assessment of PND [20, 21]. Upon  
20  
21 completion of the screening, the trained nurses proceed with face-to-face interview, in the  
22  
23 same private room, using the WHO Multi-country Study on Women's Health and Life Events  
24  
25 questionnaire [22] including few added questions based on the variables in the conceptual  
26  
27 framework. The added questions were tested for face validity before being used in this study.  
28  
29

30  
31 The nurses, two nurses per selected clinic, were given a five-day training on interview  
32  
33 technique and exposure to PND and IPV, including management and referral process.  
34  
35 Potential risk of interviewer bias was minimized by assessing interviewer skill during role-play  
36  
37 sessions and ad-hoc supervision at the clinics by research team members. The whole  
38  
39 questionnaire, except for EPDS, was installed as web-based application into mobile device  
40  
41 with in-built quality check and administered as computer-assisted personal interview. The  
42  
43 responses from EPDS were manually key-in into the application after the interview session  
44  
45 ended. Data collection started from 1 June and completed by end of October 2016.  
46  
47

## 48 **Variables**

### 49 Outcome variable

50  
51  
52 The main outcome of this study, probable postnatal depression (PND), was assessed using  
53  
54 self-administered locally validated Edinburgh Postnatal Depression Scale, EPDS. This scale  
55  
56 comprises of 10 statements on common depressive symptoms and using Likert-type of  
57

1  
2  
3 responses; 0-3 scores, reflecting the severity of the symptoms. Wan Mahmud et al found  
4 that, at 11/12 cut-off score, the sensitivity and specificity of the EPDS were 100% and  
5 98.18%, respectively [20]. Another validation study recommended cut-off score of 11.5 with  
6 sensitivity of 72.7% and specificity of 92.6% [21]. In the first study, EPDS was tested against  
7 ICD-10 criteria, with assessment of concurrent validity against Malay version of General  
8 Health Questionnaire and the Hamilton Depression Rating Scale (HDRS) score [20]. The  
9 second study was tested and showed good correlation with both Malay version of Beck-  
10 Depression Inventory and the HDRS [21]. Based on these two studies and consensus from  
11 the content expert, we categorised women who have a total score of 12 or more and/or  
12 positive response to Question 10 on risk of self-harming in EPDS as having probable  
13 postnatal depression in this study.  
14  
15  
16  
17  
18  
19  
20  
21  
22  
23  
24  
25

#### 26 Predictor variables

27  
28 Intimate partner violence (IPV) as the main predictor was defined as lifetime/ever  
29 experiences of physical and/or sexual violence. The IPV was assessed based on the  
30 questionnaire used in the WHO Multi-country Study on Women's Health and Life Events [23].  
31 In this study, we used locally validated questionnaire by Saddki et al, which reported  
32 Cronbach's  $\alpha$  values ranged from 0.767 to 0.858 across domains [22]. Using this  
33 questionnaire, four types of violence behaviours were assessed; physical, sexual, emotional  
34 violence and controlling behaviour. Physical violence was considered when respondent gave  
35 positive response to history of being slapped, pushed, beaten, kicked, choked or threatened  
36 with weapon, while sexual violence was defined as positive response for any history of  
37 sexual coercion, sex out of fear, or forced to engage in degraded sexual act. Emotional  
38 violence was defined as positive response to ever been insulted, publicly humiliated,  
39 intimidated or ever been threatened or threatened to hurt respondent or someone she cared.  
40 Controlling behaviour was defined as positive response to ever been kept away from friends  
41 and/or immediate family, insisted to know where about at all times, treated indifferently, felt  
42 angry if spoke to other man, suspicious of being unfaithful and/or expected permission to  
43  
44  
45  
46  
47  
48  
49  
50  
51  
52  
53  
54  
55  
56  
57  
58  
59  
60



1  
2  
3 seek healthcare of herself by their former or present husbands/partners. In this study, the  
4 emotional violence and controlling behaviour were considered as possible predictors for  
5 PND, and not part of IPV.  
6  
7

8  
9  
10 Other important predictors are lack of family support and unplanned pregnancy. Family  
11 support during confinement was considered when the respondent answer "Yes" to the  
12 questions; "Did you observed confinement period after your last child birth?" and "When you  
13 need help or have a problem, can you usually count on family members for support?"  
14 Response to the question; "Was your last pregnancy planned or not planned?" was taken  
15 into account to categorise the pregnancy as planned or unplanned.  
16  
17  
18  
19  
20  
21  
22  
23

24 Possible confounding variables include age, ethnicity, marital status, education level,  
25 occupation and household income. Age was grouped into four categories; 18-24 years, 25-  
26 29 years, 30-34 years, and 35 years and more. Ethnicity was classified based on three major  
27 ethnic groups in Malaysia, namely Malay, Malaysian Chinese and Malaysian Indian, followed  
28 by 'Other Bumiputera' and 'Others'. Other Bumiputera comprised of indigenous groups, local  
29 Sabahans and Sarawakians, while 'Others' were mostly foreigners, immigrants, both legal  
30 and illegal, residing in Malaysia.  
31  
32  
33  
34  
35  
36  
37  
38  
39

40 Education levels were categorised based on the Malaysian education system. Respondents  
41 were considered as having no formal education/primary education if they had not attended  
42 any formal schooling up to those who had completed up to six years of primary school.  
43 Those who had completed 11 years of formal schooling were considered as completed  
44 secondary education, while respondents with diploma or higher qualifications were  
45 considered as having completed tertiary education. Household income was calculated based  
46 on the pooled income of family members and categorised into four groups.  
47  
48  
49  
50  
51  
52  
53  
54  
55

## 56 **Sample size**

57

1  
2  
3 To the best of our knowledge, there is no information on the prevalence of IPV among  
4 women during postnatal period in Malaysia. Thus, sample size in this study was determined  
5 based on three available sources; 20.7% prevalence of probable PND in Malaysia [4], 8.0%  
6 prevalence of IPV in Malaysia [14], and 35.2-38.9% of family violence among women with  
7 probable perinatal depression from a systematic review [24]. To ensure adequate sample,  
8 the sample size was calculated based on the lowest prevalence (8.0%) using a single  
9 proportion formula for the estimation of prevalence. In addition, based on the design effect of  
10 2 and estimated non-response rate of 20%, the sample size required was 6,639 women.  
11  
12  
13  
14  
15  
16  
17  
18  
19

### 20 **Data management and analysis**

21  
22 Data from the mobile device was automatically uploaded into the server at the institute and  
23 converted into CSV and SPSS files. Only data with complete responses on EPDS module  
24 was used for analysis. Data was analysed using complex sample module in the IBM  
25 Statistical Package of Social Sciences (SPSS) for Windows version 23.0 (IBM Corp.,  
26 Armonk, NY, USA), taking into consideration the complexity of the sampling design. The  
27 survey or final weight was calculated based on design weight and non-response weight, and  
28 plan for analysis was created. Categorical variables were defined based on the variable  
29 operational definitions. Using complex sample module, the overall prevalence of PND and its  
30 estimated population affected were determined. Bivariate analysis was done to determine the  
31 factors associated with PND. Crude odds ratios were used to describe the strength of  
32 association between dependent and independent variables. Multivariable logistic regression  
33 model was fitted to determine the factors associated with PND. The primary predictor was  
34 IPV (physical and/or sexual violence). Other independent variables included in this study  
35 were emotional violence, controlling behaviour, family support during confinement,  
36 unplanned pregnancy, and partner's alcohol consumption. Other possible confounders such  
37 as ethnicity, respondent's age, marital status, education level, occupation, and household  
38 income were also included. We used a logistic regression model to produce crude odds ratio  
39 as a measure of association between PND and the independent variables. For the final  
40  
41  
42  
43  
44  
45  
46  
47  
48  
49  
50  
51  
52  
53  
54  
55  
56  
57  
58  
59  
60

1  
2  
3 model, FORWARD LR variable selection method was used to obtain significant variables.  
4  
5 Only variables with  $p$ -value of less than 0.25 were included. The statistical significance of the  
6  
7 individual regression coefficient was tested using Wald chi-square statistic. The adjusted OR,  
8  
9 with the respective 95% confidence intervals (CIs), was then calculated. A  $p$ -value of less  
10  
11 than 0.05 was considered significant. Model fit was tested by the Hosmer-Lemeshow  
12  
13 statistic, which was non-significant ( $p>0.05$ ).  
14  
15

## 16 17 **Ethics**

18 Approval from the Medical Research and Committee, Ministry of Health Malaysia was  
19  
20 obtained prior to the implementation of this study (NMRR-15-2404-26677). All participants  
21  
22 gave their informed consent to participate. Identifiable data was not key-in into the mobile  
23  
24 device. Women who were found as having positive EPDS and/or positive for any type of  
25  
26 violence were referred to the Family Physician at the respective clinics for further  
27  
28 management.  
29  
30  
31

## 32 33 **RESULTS**

34 Out of 6639 randomly selected respondents, 5745 were successfully interviewed, but only  
35  
36 5727 completed the EPDS questions, resulting in a response rate of 85.9%. A total of 442  
37  
38 respondents defaulted clinic appointments, non-contactable or moved out from the clinic's  
39  
40 operation area during their eligibility period (6-16 weeks postpartum). Another 452  
41  
42 respondents refused to participate, while 18 respondents had incomplete EPDS data (**Figure**  
43  
44 **2**). No difference was found in the characteristics; age, ethnicity or sex of the respondents  
45  
46 and non-respondents.  
47  
48  
49

50 [INSERT FIGURE 2]  
51  
52  
53  
54  
55  
56  
57  
58  
59  
60

We used 5727 data in the analysis. By profiles, majority of the respondents were between the ages of 25 and 35 years. Majority of them were married, had attained at least secondary education level, and half of them were working mothers (**Table 1**).

**Table 1: Sociodemographic profile of respondents (n=5727)**

|                                | Unweighted count | Percentage (%) |
|--------------------------------|------------------|----------------|
| <b>Age</b>                     |                  |                |
| 18-24                          | 1043             | 18.2           |
| 25-29                          | 1842             | 32.2           |
| 30-34                          | 1749             | 30.5           |
| 35 and above                   | 1093             | 19.1           |
| <b>Ethnic</b>                  |                  |                |
| Malay                          | 3889             | 67.9           |
| Malaysian Chinese              | 549              | 9.6            |
| Malaysian Indians              | 262              | 4.6            |
| Other Bumiputeras              | 753              | 13.1           |
| Others                         | 274              | 4.8            |
| <b>Marital Status</b>          |                  |                |
| Married/have partner           | 5654             | 98.7           |
| Not married/no current partner | 73               | 1.3            |
| <b>Education status</b>        |                  |                |
| No formal/ Primary             | 382              | 7.2            |
| Secondary                      | 3300             | 60.0           |
| Tertiary                       | 2045             | 32.8           |
| <b>Occupation</b>              |                  |                |
| Working                        | 2807             | 49.0           |

|                          |      |      |
|--------------------------|------|------|
| Not working/ Housewife   | 2920 | 51.0 |
| <b>Household income*</b> |      |      |
| Less than RM1500         | 1575 | 27.5 |
| RM1501-RM3000            | 1879 | 32.8 |
| RM3001-RM5000            | 1308 | 22.9 |
| RM5001 and more          | 958  | 16.7 |

\*missing data=7; 1USD= RM3.89 (currency exchange on 3 February 2018).

### Prevalence of probable postnatal depression

Prevalence of probable PND among women at 6-16 weeks postpartum was 4.4% (95% Confidence Interval, CI: 2.9, 6.7). There was no difference in the prevalence by different age groups. The prevalence was higher among 'other Bumiputeras' and 'other ethnics' compared to the Malays. Women who were unmarried, low education status, not working, and low household income were observed to have a higher prevalence. Women with partners who consumed alcohol, those with unplanned pregnancy and without family support during confinement were also found to have a higher prevalence of probable PND (**Table 2**).

**Table 2: Factors associated with probable postnatal depression (n=5727)**

|                             | Variables         | Prevalence<br>(95% CI) | Crude OR<br>(95% CI) |
|-----------------------------|-------------------|------------------------|----------------------|
| Respondent's age<br>(years) | 18-24             | 6.9 (3.8, 12.4)        | 1.49 (0.96, 2.13)    |
|                             | 25-29             | 4.6 (3.0, 7.2)         | 0.93 (0.63, 1.37)    |
|                             | 30-34             | 3.1 (1.9, 4.8)         | 0.69 (0.45, 1.04)    |
|                             | 35 and above      | 4.0 (2.2, 7.1)         | R                    |
| Ethnicity                   | Malay             | 3.7 (2.5, 5.5)         | R                    |
|                             | Malaysian Chinese | 1.7 (0.8, 3.7)         | 0.69 (0.38, 1.26)    |
|                             | Malaysian Indian  | 4.5 (2.0, 9.7)         | 1.48 (0.81, 2.72)    |

|                                           |                               |                   |                     |
|-------------------------------------------|-------------------------------|-------------------|---------------------|
|                                           | Other Bumiputeras             | 9.1 (3.6, 20.9)   | 2.63 (1.90, 3.62)   |
|                                           | Others                        | 5.1(2.3, 10.5)    | 1.92 (1.12, 3.27)   |
| Marital Status (current)                  | Married/Have partner          | 4.2 (2.7, 6.5)    | R                   |
|                                           | Unmarried/ no current partner | 17.6 (7.1, 37.5)  | 3.14 (1.49, 6.64)   |
| Education level                           | No formal/ Primary education  | 8.9 (3.5, 20.9)   | 2.46 (1.53, 3.95)   |
|                                           | Secondary education           | 4.7 (3.1, 6.9)    | 1.45 (1.06, 1.97)   |
|                                           | Tertiary education            | 2.9 (1.8, 4.6)    | R                   |
| Occupation                                | Working                       | 2.5 (1.5, 4.1)    | R                   |
|                                           | Not working/housewife         | 6.1 (3.9, 9.5)    | 1.88 (1.42, 2.49)   |
| Household income                          | Lower than RM1500             | 8.5 (5.0, 13.9)   | 3.75 (2.29, 6.14)   |
|                                           | RM1500-RM3000                 | 3.4 (2.3, 5.0)    | 1.74 (1.04, 2.93)   |
|                                           | RM3001-RM5000                 | 2.2 (1.2, 3.9)    | 1.00 (0.55, 1.82)   |
|                                           | RM5001 and more               |                   | R                   |
| Unplanned pregnancy                       | Yes                           | 11.5 (5.6, 22.2)  | 4.19 (3.10-5.67)    |
|                                           | No                            | 2.7 (1.7, 4.1)    | R                   |
| Partner's consumed alcohol                | Yes                           | 5.6 (3.3, 9.4)    | 1.71 (1.20, 2.42)   |
|                                           | No                            | 3.5 (2.2, 5.5)    | R                   |
| Lack of family support during confinement | Yes                           | 10.8 (6.2, 18.1)  | 2.80 (1.96, 3.99)   |
|                                           | No                            | 3.8 (2.5, 5.7)    | R                   |
| Emotional violence                        | Yes                           | 27.1 (18.1, 38.4) | 8.94 (6.21, 12.87)  |
|                                           | No                            | 3.5 (2.2, 5.8)    | R                   |
| Physical violence                         | Yes                           | 29.7 (19.4, 42.6) | 7.50 (4.75, 11.83)  |
|                                           | No                            | 3.7 (2.3, 6.0)    | R                   |
| Sexual violence                           | Yes                           | 43.8 (27.9, 61.1) | 15.10 (8.91, 25.60) |
|                                           | No                            | 3.9 (2.4, 6.2)    | R                   |

|           |             |     |                   |                    |
|-----------|-------------|-----|-------------------|--------------------|
| Partner's | controlling | Yes | 7.2 (5.0, 10.1)   | 2.31 (1.76, 3.03)  |
| behaviour |             | No  | 3.2 (1.7, 6.1)    | R                  |
| IPV*      |             | Yes | 32.6 (22.8, 44.1) | 9.32 (6.29, 13.82) |
|           |             | No  | 3.5 (2.1, 5.7)    | R                  |

CI= Confidence interval, OR= Odds Ratio; IPV: ever experienced physical and/or sexual violence

1USD= RM3.89 (currency exchange on 3 February 2018).

### Prevalence of intimate partner violence

With regards to violence, 3.7% (95% CI: 2.7, 5.0), 2.6% (95% CI: 1.9, 3.5) and 1.2% (95% CI: 0.9, 1.7) ever experienced emotional, physical and sexual violence, respectively. Partner's controlling behaviour was experienced by 30.2% (95% CI: 24.2, 36.9) of women. Most of the violence happened in combination. Analysis showed that 1.7%, 0.7%, and 0.5%, reported emotional violence only, physical violence only, and sexual violence only, respectively. Intimate partner violence; ever experienced physical and/or sexual violence, was observed among 3.3% (95% CI: 2.5, 4.3) of women.

### Factors associated with probable postnatal depression

Multivariate analysis proved the relationship between IPV and probable PND. The odds of having probable PND was doubled among women who ever experienced IPV (adjusted Odds Ratio, aOR: 2.34; 95% CI: 1.12, 4.87), after controlling for age, marital status, ethnicity, education level, occupation, and partner's controlling behaviour. Probable PND was almost four times higher among women who ever experienced emotional violence (aOR: 3.79; 95% CI: 1.93, 7.45), after controlling for other variables. In addition, probable PND was three times higher among women with unplanned pregnancy (aOR: 3.32; 95% CI: 2.35, 4.69), 79% higher among those who lack of family support during confinement (aOR: 1.79; 95% CI: 1.12, 2.87), 59% higher among those reported partner's alcohol consumption (aOR: 1.59, 95% CI:

1.07, 2.35), and tripled among women with household income of less than RM1500 (aOR: 2.99; 95% CI: 1.63, 5.49) as compared to those earned more than RM5000 (**Table 3**).

**Table 3: Multivariate analysis on factors associated with probable postnatal depression (n=5727)**

|                                           | Variables         | Wald   | Adjusted OR<br>(95% CI) | p value |
|-------------------------------------------|-------------------|--------|-------------------------|---------|
| Intimate Partner Violence                 | Yes               | 5.141  | 2.34 (1.12, 4.87)       | 0.023   |
|                                           | No                |        | R                       |         |
| Emotional Violence                        | Yes               | 14.935 | 3.79 (1.93, 7.45)       | <0.001  |
|                                           | No                |        | R                       |         |
| Unplanned pregnancy                       | Yes               | 46.591 | 3.32 (2.35, 4.69)       | <0.001  |
|                                           | No                |        | R                       |         |
| Lack of family support during confinement | Yes               | 5.999  | 1.79 (1.12, 2.87)       | 0.014   |
|                                           | No                |        | R                       |         |
| Partner's alcohol consumed                | Yes               | 5.351  | 1.59 (1.07, 2.35)       | 0.021   |
|                                           | No                |        | R                       |         |
| Household income                          | Lower than RM1500 | 12.438 | 2.99 (1.63, 5.49)       | <0.001  |
|                                           | RM1500-RM3000     | 3.459  | 1.82 (0.97, 3.41)       | 0.063   |
|                                           | RM3001-RM5000     | 0.054  | 1.09 (0.53, 2.23)       | 0.816   |
|                                           | RM5001 and more   |        | R                       |         |

CI= Confidence interval, OR= Odds Ratio,

Controlled for age, marital status, education level, occupation, ethnic, partner's controlling behaviour



## DISCUSSION

To the best of our knowledge, this is the first study investigating the relationship between probable PND and IPV using a large number of respondents in Malaysia. This study examined the associated factors of probable PND, with IPV as the main predictor. An earlier population-based study observed that IPV is a significant public health problem in Malaysia [14], and studies on PND have also demonstrated its importance [4, 5]. Our study clearly revealed the relationship between these two problems, which has implication for the planning of services and intervention strategies.

### Prevalence of probable postnatal depression

The prevalence of probable PND (4.4%) in our study was lower than those reported in an earlier study conducted in one of the states in Malaysia, named Kelantan (20.3%) [4]. Both studies were conducted at primary care clinics, using similar screening tool with similar cut-off score, but targeting women at different timing of postpartum. Our nationwide study targeted women at 6-16 weeks postpartum while the Kelantan study targeted women at 4-6 weeks postpartum. The difference in the prevalence might be due to the different timing of screening. Longitudinal studies reported that the incidence rates decreased over postpartum period [25, 26]. The prevalence in this study was also lower than an earlier nationwide household survey conducted in Malaysia, using similar screening tool and target population, with prevalence of probable postnatal depression of 12.7% [27]. Another possible reason for the lower prevalence in this study was the reluctance of the women to disclose their problem, possibly due to fear of being stigmatized. The clinic environment may not be conducive for study involving sensitive issues such as this. Postnatal depression and violence by an intimate partner are relatively hidden in our community and there is a possibility of a higher prevalence if we were able to create awareness and desensitised the issues before embark on this study. However, the prevalence of this study is comparable to those reported in Indonesia (6.6%) among women at 6 weeks postpartum, using similar cut-off score, and in Singapore (6.8%) among similar target group but using lower cut-off score[2].

### **Association between intimate partner violence and probable postnatal depression**

Our study demonstrated significant association between probable PND and IPV (defined as ever/lifetime physical and/or sexual violence). This finding concurs with previous studies that recorded the independent effect of IPV with PND [24, 28-32]. The effect of IPV on women's mental health was not related to time of occurrence. Khalifa et al described history of violence as the strongest determinant of PND [28], while studies in France and Bangladesh supported the association of ever had IPV before or during pregnancy with PND [31, 32]. A prospective study among Norwegian mothers also showed higher risks of PND among those with history of exposure to adult abuse including sexually abused [33]. We also recorded strong association between emotional violence with the occurrence of probable PND, even after adjustment for partner's controlling behaviour and other confounding variables. Psychological effect of emotional violence towards PND was more prominent than IPV, as seen in other studies [34-37]. Emotional violence has a negative impact on emotions and mental health of women in postpartum period and often potentially contributes to physical or sexual violence [38].

### **Other factors associated with probable postnatal depression**

Other than IPV, we also noted higher odds of probable PND among mothers of low income families, those with partners who consumed alcohol and those with lack of support during confinement. Financial difficulties have been identified as risk factors for PND independent of IPV [13, 30, 39]. The association with partner's substance use was also observed in the Canadian study [39]. Substance use by husbands/partners often associated with IPV which may give rise to the problem of PND in women [28]. Family support during confinement is very important in Asian community. Our study demonstrated that lack of family support during confinement independently associated with higher odds of PND. Our findings concur with other studies that demonstrated similar associations [13, 40, 41]. A study from China concluded that lack of postnatal family support, particularly the support from husband, is an important risk factor of PND [42]. We observed that marital status, education level, and

1  
2  
3 occupation do not contribute directly to PND. As in many Asian countries, women in Malaysia  
4 are expected to primarily care for children and manage housechores as prescribed by  
5 traditional gender roles, regardless whether they are working or not [43]. The cultural norms  
6 may assign an inferior status to women and lead to misconceptions that may cause women  
7 to blame themselves, minimize abuse and prevent help-seeking when abuse occurred.  
8 Perpetrators may manipulate cultural practices or religious teaching to make it seems as if it  
9 supports IPV. Many women struggle because they believe that their husbands have the  
10 rights to beat them, a belief originated from misinterpreted religious teaching [44]. In contrast,  
11 women in Malaysia are more empowered, evidenced by the increasing number of educated  
12 women and women in workforce, and this may challenge the traditional view on gender roles  
13 [43]. The stronger affiliation to religion and its true teaching among Asians can be protective  
14 against IPV as religion promotes general commitment to family life, regards the institution of  
15 marriage highly and provides understanding of women's rights [44]. Interestingly, a large  
16 prevalence study on IPV in Malaysia found that 83% of women who experienced IPV were  
17 assertive in seeking help for their survival in abusive relationship rather than continuing to  
18 suffer in silence [45].

### 37 **Strengths and limitations**

38  
39 The main strength of our study is the large nationally representative data with robust  
40 methods. Moreover, the response rate was relatively high (85.9%) despite the sensitive  
41 nature of the issue. We also examined various socio-demographic and socio-cultural factors.  
42 Most importantly, this study used an internationally recognized tool which was locally  
43 validated with standard training given to data collectors. Nevertheless, our findings have  
44 several limitations. One of the limitations of this study was the cross-sectional nature of the  
45 study which prevents the determination of temporal relationship between exposure to IPV  
46 and probable PND. Even though a substantial number of possible confounders were  
47 adjusted in this study, some of the important variables were not studied, such as birth  
48  
49  
50  
51  
52  
53  
54  
55  
56  
57  
58  
59  
60

1  
2  
3 complication, child morbidity and breastfeeding. We were only able to identify probable PND  
4  
5 due to the use of a screening tool without further diagnostic confirmation process. It is also  
6  
7 acknowledged that 'postnatal depression' is an umbrella term rather than a distinct  
8  
9 psychological state. The term "postpartum depression" encompasses several mood  
10  
11 disorders that follow childbirth, including anxiety disorders, trauma and adjustment reactions  
12  
13 [46]. This broad spectrum of perinatal mental health may be associated with different sets of  
14  
15 risk factors that may or may not overlap with each other, thus confounding the outcome of  
16  
17 this study. Furthermore, the WHO tool used to identify IPV, while used widely, may not be  
18  
19 exhaustive in terms of types of violence, which may underestimate the prevalence of IPV.  
20  
21 However, with all the limitations, this study was able to provide a baseline data and offers  
22  
23 insight of the association between IPV and probable PND in Malaysia.  
24  
25

## 26 **CONCLUSION AND POLICY IMPLICATIONS**

27  
28 A higher odds of probable PND was observed among women with history of IPV. Women  
29  
30 who were exposed to emotional violence, those with husbands who consumed alcohol, lack  
31  
32 of family support during confinement and from low income families, were also at-risk of PND.  
33  
34 Pregnancy care and postnatal programmes must address issues related to PND and IPV as  
35  
36 there is overwhelming evidence of adverse health effects on both mother and child. Health  
37  
38 care personnel must be professionally trained to be able to detect and confidently  
39  
40 communicate these issues. There must be proper setting as well as trained personnel to  
41  
42 provide help and proper counselling or referral. Issues pertaining to sexual and reproductive  
43  
44 health, women's rights and violence should be incorporated into the well-established pre-  
45  
46 marital course [47]. Courses on family values and parenting skills for young couples and  
47  
48 parents could be another platform.  
49  
50

## 51 **Acknowledgement**

1  
2  
3 The authors wish to thanks the Director General of Health Malaysia for his permission to  
4 publish this article. Our gratitude to the Asia Pacific International Research and Education  
5 (ASPIRE) Network, for their contribution in the concept of this study.  
6  
7  
8  
9

### 10 **Authors' contribution**

11  
12 NAA, UAS, and TA were responsible for the study design and concept. NAA was responsible  
13 for the study conduct, respondents selection, study implementation, data analysis, data  
14 interpretation, drafting, critical revision and final approval of the manuscript. UAS, AR, MM  
15 and CYY were responsible in drafting, critical revision and final approval of the manuscript.  
16  
17 NMK, MY, AAR, MO, FAAA, and RJ were responsible for respondents recruitment, data  
18 collection, data entry, critical revision and final approval of the manuscript. FI and NI were  
19 responsible for data interpretation, critical revision and final approval of the manuscript.  
20  
21  
22  
23  
24  
25  
26  
27

### 28 **Funding**

29  
30 This study was supported by Ministry of Health Research Grant (NMRR-15-2404-26677).  
31  
32  
33

### 34 **Competing interest statement**

35  
36 All authors declare no conflict of interest  
37  
38  
39

### 40 **Patient consent**

41  
42 All respondents consented to participate in this study  
43  
44  
45

### 46 **Data sharing statement**

47  
48 Data which were used for this study is not publicly available. Data are however available  
49 from the corresponding author upon reasonable request and with permission of the Director  
50 General of Health Malaysia.  
51  
52  
53  
54  
55  
56  
57

1  
2  
3 **Figures:**

4 Figure 1: Conceptual framework illustrating hierarchical model of risk factors for postnatal  
5 depression  
6

7  
8 Figure 2: Flow diagram of respondents recruitment  
9

10  
11  
12  
13  
14  
15  
16  
17  
18  
19  
20  
21  
22  
23  
24  
25  
26  
27  
28  
29  
30  
31  
32  
33  
34  
35  
36  
37  
38  
39  
40  
41  
42  
43  
44  
45  
46  
47  
48  
49  
50  
51  
52  
53  
54  
55  
56  
57  
58  
59  
60

For peer review only

**REFERENCE:**

1. World Health Organization. Mental Health: Maternal mental health. [http://www.who.int/mental\\_health/maternal-child/maternal\\_mental\\_health/en/](http://www.who.int/mental_health/maternal-child/maternal_mental_health/en/) accessed on 15 May 2017.
2. Norhayati MN, Nik Hazlina NH, Asrene AR, et al. Magnitude and risk factors for postpartum symptoms: a literature review. *J. Affect. Disord.* 2015;175:34-52
3. Roomruangwong C, Epperson CN. Perinatal depression in Asian women: prevalence, associated factors, and cultural aspects. *Asian Biomed.* 2011;5(2):179-193.
4. Kadir AA, Nordin R, Ismail SB, et al. Postnatal depression in mothers attending primary care clinics in Kelantan, Malaysia. *International Medical Journal.* 2005; 12(2):105-109.
5. Ariffin Siti RM, Ahmad A, Rahman RA, et al. Postpartum depression in Malaysian women: the association with the timing of pregnancy and sense of personal control during childbirth. *Int.J. Acad.Res.* 2014;6(3):143-149.
6. American Psychiatric Association: Diagnostic and statistical manual of mental disorders (5th Edition). Washington, DC, 2000.
7. Paris R, Bolton RE, Weinberg MK. Postpartum depression, suicidality, and mother-infant interactions. *Arch Womens Ment Health.* 2009;12:309-321.
8. American Academy of Pediatrics. Clinical report - incorporating recognition and management of perinatal and postpartum depression into Pediatric practice. [www.pediatrics.org/cgi/doi/10.1542/peds.2010-2348](http://www.pediatrics.org/cgi/doi/10.1542/peds.2010-2348).
9. Pearson RM, Evans J, Kounali D, et al. Maternal depression during pregnancy and the postnatal period. Risk and possible mechanisms for offspring depression at age 18 years. *JAMA Psychiatry.* 2013;70(12):1312-1319.
10. Murray L, Arteche A, Fearon P, et al. Maternal postnatal depression and the development of depression in offspring up to 16 years of age. *J Am. Acad. Child Adolesc Psychiatry.* 2011;50(5):460-470.

- 1  
2  
3 11. Krug EG, Mercy JA, Dahlberg LL, et al. The World Report on Violence and Health.  
4  
5 *Lancet*. 2002;360(9339):1083-8
- 6  
7 12. Department of Reproductive Health and Reserach. Global and regional estimates of  
8  
9 violence against women: prevalence and health effects of intimate partner violence  
10  
11 and non-partner sexual violence. World Health Organization 2013.
- 12  
13 13. Fisher J, de Mello MC, Patel A, et al. Prevalence and determinants of common  
14  
15 perinatal mental disorders in women in low- and lower-middle-income countries: a  
16  
17 systematic review. *Bull World Health Organ* 2012;90:139-149G.
- 18  
19 14. Shuib R, Endut N, Ali SH, et al. Domestic violence and women's well-being in  
20  
21 Malaysia: Issues and challenges in conducting a national study using the WHO multi-  
22  
23 country questionnaire on women's health and domestic violence against women.  
24  
25 *Procedia Soc Behav Sci*. 2013;19:475-488.
- 26  
27 15. Victora CG, Huttly SR, Fuchs SC, et al. The role of conceptual frameworks in  
28  
29 epidemiological analysis: a hierarchical approach. *Int J Epidemiol*. 1997;26(1):224-7.
- 30  
31 16. Hishamshah M, Ramzan M, Rashid A, et al. (2010). Belief and practices of traditional  
32  
33 postpartum care among a rural community in Penang Malaysia. *The Internet Journal*  
34  
35 *of Third World Medicine*. 2010;9(2):1-9. <https://doi.org/10.5580/49f>
- 36  
37 17. Klainin P, Arthur DG. (2009). Postpartum depression in Asian cultures: A literature  
38  
39 review. *Int J Nurs Stud*. 2009;46(10):1355-73.  
40  
41 <https://doi.org/10.1016/j.ijnurstu.2009.02.012>
- 42  
43 18. Institute for Public Health and Institute for Health Systems Research. National Health  
44  
45 and Morbidity Survey (NHMS) 2011: Healthcare Demands and Out-of-Pocket Health  
46  
47 Expenditure. Volume III. ISBN 978-983-3887-77-4.
- 48  
49 19. Institute for Public Health (IPH), Ministry of Health Malaysia. National Health and  
50  
51 Morbidity Survey (NHMS) 2016: Maternal and Child Health. 2016:Vol II: Findings.pp  
52  
53 272. ISBN:978-983-2387-28-2. Available at <http://www.iku.gov.my>.
- 54  
55 20. Wan Mahmud WR, Awang A, Mohamed MN. Revalidation of the Malay version of the  
56  
57 Edinburgh Postnatal Depression Scale (EPDS) among Malay postpartum women



- 1  
2  
3 attending the Bakar Bata Health Centre in Alor Setar, Kedah, North West of  
4 Peninsular Malaysia. *Malays J Med Sci.* 2003;10(2):71-75.  
5  
6  
7 21. Abdul Kadir A, Nordin R, Ismail SB, et al. Validation of the Malay version of  
8 Edinburgh Postnatal Depression Scale for Postnatal women in Kelantan, Malaysia.  
9  
10 *Asia Pac Fam Med.* 2004;3(1-2):9-18.  
11  
12 22. Saddki N, Sulaiman Z, Ali SH, et al. Validity and reliability of the Malay version of  
13 WHO Women's Health and Life Experiences Questionnaire. *J Interpers Violence.*  
14 2013;28(12):2557-2580.  
15  
16  
17 23. World Health Organization. WHO Multi-country Study on Women's Health and Life  
18 Events Questionnaire (version 9.9). In: WHO multi-country study on women's health  
19 and domestic violence against women: initial results on prevalence, health outcomes  
20 and women's responses. 2005. Geneva, Switzerland.  
21  
22  
23 24. Howard LM, Oram S, Galley H, et al. Domestic violence and perinatal mental  
24 disorders: a systematic review and meta-analysis. *PLOS Medicine.*  
25 2013;10(5):e1001452.  
26  
27  
28 25. Abdollahi F, Zarghami M, Azhar MZ, et al. Predictors and incidence of post-partum  
29 depression: a longitudinal cohort study. *J Obstet Gynaecol Res.* 2014.  
30 doi:10.1111/jog.12471 accessed on 3 May 2017.  
31  
32  
33 26. Escriba-Aguir V, Artazcoz L. Gender differences in postpartum depression: a  
34 longitudinal cohort study. *J Epidemiol Community Health.* 2011;65:320-326.  
35  
36  
37 27. Institute for Public Health (IPH), National Institutes of Health, Ministry of Health  
38 Malaysia. National Health and Morbidity Survey (NHMS) 2016: Maternal and Child  
39 Health. Vol. II: Findings. 2016. Available at <http://www.iku.gov.my>.  
40  
41  
42 28. Khalifa DS, Glavin K, Bjertness E, et al. Determinants of postnatal depression in  
43 Sudanese women at 3 months postpartum: a cross-sectional study. *BMJ Open.*  
44 2016;6:e009443.doi:10.1136/bmjopen-2015-009443. Accessed on 7 July 2017  
45  
46  
47  
48  
49  
50  
51  
52  
53  
54  
55  
56  
57  
58  
59  
60

- 1  
2  
3 29. Nongrum R, Thomas E, Lionel J, et al. Domestic violence as a risk factor for maternal  
4 depression and neonatal outcomes: a hospital-based cohort study. *Indian J Psychol*  
5 *Med.* 2014;36(2):179-181.  
6  
7  
8  
9 30. Nasreen HE, Edhborg M, Petzold M, et al. Incidence and risk factors of postpartum  
10 depressive symptoms in women: a population-based prospective cohort study in a  
11 rural district in Bangladesh. *J Depress Anxiety.* 2015;4:2.  
12 <http://dx.doi.org/10.4172/2167-1044.1000180> accessed on 5 May 2017.  
13  
14  
15  
16 31. Gaillard A, Strat YL, Mandelbrot L, et al. Predictors of postpartum depression:  
17 prospective study of 264 women followed during pregnancy and postpartum.  
18 *Psychiatry Research.* 2014;215:341-346.  
19  
20  
21  
22 32. Islam MH, Broidy L, Baird K, et al. Intimate partner violence around the time of  
23 pregnancy and postpartum depression: the experience of women of Bangladesh.  
24 *PloS ONE.* 2017;12(5):e0176211. <http://doi.org/10.1371/journal.pone.0176211>.  
25  
26  
27  
28 Accessed on 7 July 2017.  
29  
30  
31 33. Sorbo MF, Grimstad H, Bjongaard JH, et al. Adult physical, sexual, and emotional  
32 abuse and postpartum depression, a population based, prospective study of 53,065  
33 women in the Norwegian Mother and Child Cohort Study. *BMC Pregnancy Childbirth.*  
34 2014;14:316. <http://www.biomedcentral.com/147-2393/14/316> accessed on 7 July  
35  
36  
37  
38 2017.  
39  
40  
41 34. Shamu S, Zarowsky C, Roelens K, et al. High-frequency intimate partner violence  
42 during pregnancy, postnatal depression and suicidal tendencies in Harare,  
43 Zimbabwe. *Gen Hosp Psychiatry.* 2016;38:109-114.  
44  
45  
46 35. Ludermir AB, Lewis G, Valongueiro SA, et al. Violence against women by their  
47 intimate partner during pregnancy and postnatal depression: a prospective cohort  
48 study. *Lancet* 2010;376:903-910.  
49  
50  
51  
52 36. Zhang Y, Zou S, Cao Y, et al. Relationship between domestic violence and postnatal  
53 depression among pregnant Chinese women. *Int J Gynaecol and Obstetrics.*  
54 2012;116:26-30.  
55  
56  
57  
58  
59  
60

- 1  
2  
3 37. Desmarais SL, Pritchard A, Lowder EM, et al. Intimate partner abuse before and  
4 during pregnancy as risk factors for postpartum mental health problems. *BMC*  
5 *Pregnancy Childbirth*. 2014;14:132  
6  
7  
8  
9 38. Miura A, Fujiwara T. Intimate partner violence during pregnancy and postpartum  
10 depression in Japan: a cross-sectional study. *Front Public Health*. 2017;5:81.  
11 doi:10.3389/fpubh.2017.00081  
12  
13  
14 39. Dennis CL, Vigod S. The relationship between postpartum depression, domestic  
15 violence, childhood violence, and substance use: epidemiologic study of a large  
16 community sample. *Violence Against Women*. 2013;19(4):503-517.  
17  
18  
19  
20 40. Castro F, Place JMS, Billings DL. Risk profiles associated with postnatal depressive  
21 symptoms among women in a public sector hospital in Mexico: the role of  
22 sociodemographic and psychological factors. *Arch Women Ment Health*.  
23 2015;18:463-471.  
24  
25  
26  
27  
28 41. Jones E, Coast E. Social relationships and postpartum depression in South Asia: a  
29 systematic review. *Int J Soc Psychiatry*. 2012;59(7):690-700.  
30  
31  
32 42. Xie RH, Yang JZ, Liao SP, et al. Prenatal family support, postnatal family support  
33 and postpartum depression. *Aust N Z J Obstet Gynaecol*. 2010;50:340-345.  
34  
35  
36 43. Abdullah K, Noor NM, Wok S. The perceptions of women's roles and progress: A  
37 study of Malay Women. *Social Indicators Research*, 2008;89(3):439-455.  
38 https://doi.org/10.1007/s11205-008-9242-7  
39  
40  
41 44. Ibrahim N, Abdalla M. A critical examination of Qur'an 4:34 and its relevance to  
42 intimate partner violence in Muslim families. *Journal of Muslim Mental Health*.  
43 2010;5(3):327-349. https://doi.org/10.1080/15564908.2010.551278  
44  
45  
46 45. Oon SW, Shuib R, Ali SH, et al. Exploring the coping mechanism of women  
47 experiencing Intimate Partner Violence in Malaysia. *IJASOS*. 2016;11(5):820-825.  
48  
49  
50 46. Thurgood, S., Avery, D., & Williamson, L. (2009). Postpartum Depression (PPD).  
51 *American Journal of Clinical Medicine*. 2009;6(2):17-22. Retrieved from  
52 <http://www.aapsus.org/articles/11.pdf> on 4 February 2018  
53  
54  
55  
56  
57

1  
2  
3 47. Senediak C. The value of premarital education. ANZ J Fam Ther. 1990;11(1):26-31.  
4  
5  
6  
7  
8  
9  
10  
11  
12  
13  
14  
15  
16  
17  
18  
19  
20  
21  
22  
23  
24  
25  
26  
27  
28  
29  
30  
31  
32  
33  
34  
35  
36  
37  
38  
39  
40  
41  
42  
43  
44  
45  
46  
47  
48  
49  
50  
51  
52  
53  
54  
55  
56  
57  
58  
59  
60

For peer review only

1  
2  
3  
4  
5  
6  
7  
8  
9  
10  
11  
12  
13  
14  
15  
16  
17  
18  
19  
20  
21  
22  
23  
24  
25  
26  
27  
28  
29  
30  
31  
32  
33  
34  
35  
36  
37  
38  
39  
40  
41  
42  
43  
44  
45  
46  
47  
48  
49  
50  
51  
52  
53  
54  
55  
56  
57  
58  
59  
60

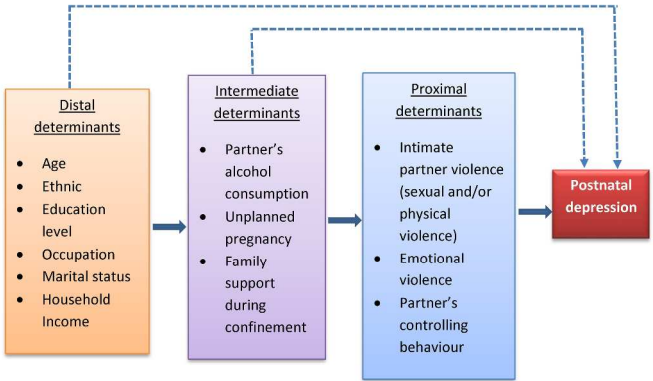

Figure 1: Conceptual framework illustrating hierarchical model of risk factors for postnatal depression

297x420mm (300 x 300 DPI)

1  
2  
3  
4  
5  
6  
7  
8  
9  
10  
11  
12  
13  
14  
15  
16  
17  
18  
19  
20  
21  
22  
23  
24  
25  
26  
27  
28  
29  
30  
31  
32  
33  
34  
35  
36  
37  
38  
39  
40  
41  
42  
43  
44  
45  
46  
47  
48  
49  
50  
51  
52  
53  
54  
55  
56  
57  
58  
59  
60

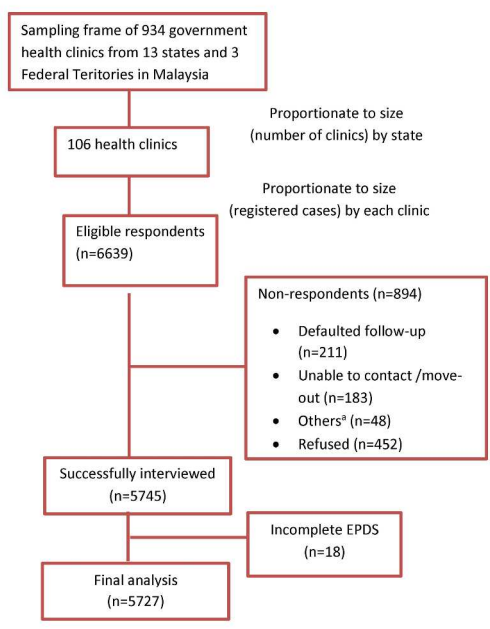

\*Others include communication/language barriers or duplicated name in the dataset

Figure 2: Flow diagram of respondents recruitment

297x420mm (300 x 300 DPI)

**STROBE 2007 (v4) Statement—Checklist of items that should be included in reports of *cross-sectional studies***

| Section/Topic                | Item # | Recommendation                                                                                                                                                                       | Reported on page # |
|------------------------------|--------|--------------------------------------------------------------------------------------------------------------------------------------------------------------------------------------|--------------------|
| Title and abstract           | 1      | (a) Indicate the study’s design with a commonly used term in the title or the abstract                                                                                               | 6                  |
|                              |        | (b) Provide in the abstract an informative and balanced summary of what was done and what was found                                                                                  | 6-7                |
| <b>Introduction</b>          |        |                                                                                                                                                                                      |                    |
| Background/rationale         | 2      | Explain the scientific background and rationale for the investigation being reported                                                                                                 | 8-9                |
| Objectives                   | 3      | State specific objectives, including any prespecified hypotheses                                                                                                                     | 9                  |
| <b>Methods</b>               |        |                                                                                                                                                                                      |                    |
| Study design                 | 4      | Present key elements of study design early in the paper                                                                                                                              | 10                 |
| Setting                      | 5      | Describe the setting, locations, and relevant dates, including periods of recruitment, exposure, follow-up, and data collection                                                      | 10-11              |
| Participants                 | 6      | (a) Give the eligibility criteria, and the sources and methods of selection of participants                                                                                          | 10-11              |
| Variables                    | 7      | Clearly define all outcomes, exposures, predictors, potential confounders, and effect modifiers. Give diagnostic criteria, if applicable                                             | 10-13              |
| Data sources/<br>measurement | 8*     | For each variable of interest, give sources of data and details of methods of assessment (measurement). Describe comparability of assessment methods if there is more than one group | 10-13              |
| Bias                         | 9      | Describe any efforts to address potential sources of bias                                                                                                                            | 11                 |
| Study size                   | 10     | Explain how the study size was arrived at                                                                                                                                            | 14                 |
| Quantitative variables       | 11     | Explain how quantitative variables were handled in the analyses. If applicable, describe which groupings were chosen and why                                                         | 14-15              |
| Statistical methods          | 12     | (a) Describe all statistical methods, including those used to control for confounding                                                                                                | 14-15              |
|                              |        | (b) Describe any methods used to examine subgroups and interactions                                                                                                                  | 14-15              |
|                              |        | (c) Explain how missing data were addressed                                                                                                                                          | 14                 |
|                              |        | (d) If applicable, describe analytical methods taking account of sampling strategy                                                                                                   | 11                 |
|                              |        | (e) Describe any sensitivity analyses                                                                                                                                                | NA                 |
| <b>Results</b>               |        |                                                                                                                                                                                      |                    |

|                          |     |                                                                                                                                                                                                              |       |
|--------------------------|-----|--------------------------------------------------------------------------------------------------------------------------------------------------------------------------------------------------------------|-------|
| Participants             | 13* | (a) Report numbers of individuals at each stage of study—eg numbers potentially eligible, examined for eligibility, confirmed eligible, included in the study, completing follow-up, and analysed            | 15    |
|                          |     | (b) Give reasons for non-participation at each stage                                                                                                                                                         | 15    |
|                          |     | (c) Consider use of a flow diagram                                                                                                                                                                           | 15    |
| Descriptive data         | 14* | (a) Give characteristics of study participants (eg demographic, clinical, social) and information on exposures and potential confounders                                                                     | 16-17 |
|                          |     | (b) Indicate number of participants with missing data for each variable of interest                                                                                                                          | 17    |
| Outcome data             | 15* | Report numbers of outcome events or summary measures                                                                                                                                                         | 17-20 |
| Main results             | 16  | (a) Give unadjusted estimates and, if applicable, confounder-adjusted estimates and their precision (eg, 95% confidence interval). Make clear which confounders were adjusted for and why they were included | 17-20 |
|                          |     | (b) Report category boundaries when continuous variables were categorized                                                                                                                                    | NA    |
|                          |     | (c) If relevant, consider translating estimates of relative risk into absolute risk for a meaningful time period                                                                                             | NA    |
| Other analyses           | 17  | Report other analyses done—eg analyses of subgroups and interactions, and sensitivity analyses                                                                                                               | NA    |
| <b>Discussion</b>        |     |                                                                                                                                                                                                              |       |
| Key results              | 18  | Summarise key results with reference to study objectives                                                                                                                                                     | 21-23 |
| Limitations              | 19  | Discuss limitations of the study, taking into account sources of potential bias or imprecision. Discuss both direction and magnitude of any potential bias                                                   | 23-24 |
| Interpretation           | 20  | Give a cautious overall interpretation of results considering objectives, limitations, multiplicity of analyses, results from similar studies, and other relevant evidence                                   | 24    |
| Generalisability         | 21  | Discuss the generalisability (external validity) of the study results                                                                                                                                        | 23    |
| <b>Other information</b> |     |                                                                                                                                                                                                              |       |
| Funding                  | 22  | Give the source of funding and the role of the funders for the present study and, if applicable, for the original study on which the present article is based                                                | 25    |

\*Give information separately for cases and controls in case-control studies and, if applicable, for exposed and unexposed groups in cohort and cross-sectional studies.

**Note:** An Explanation and Elaboration article discusses each checklist item and gives methodological background and published examples of transparent reporting. The STROBE checklist is best used in conjunction with this article (freely available on the Web sites of PLoS Medicine at <http://www.plosmedicine.org/>, Annals of Internal Medicine at <http://www.annals.org/>, and Epidemiology at <http://www.epidem.com/>). Information on the STROBE Initiative is available at [www.strobe-statement.org](http://www.strobe-statement.org).



# BMJ Open

## Postnatal depression and intimate partner violence: A nationwide clinic-based cross-sectional study in Malaysia

|                                 |                                                                                                                                                                                                                                                                                                                                                                                                                                                                                                                                                                                                                                                                                                                                                                                                                                                                                                                                                                                                                                                                                                                                          |
|---------------------------------|------------------------------------------------------------------------------------------------------------------------------------------------------------------------------------------------------------------------------------------------------------------------------------------------------------------------------------------------------------------------------------------------------------------------------------------------------------------------------------------------------------------------------------------------------------------------------------------------------------------------------------------------------------------------------------------------------------------------------------------------------------------------------------------------------------------------------------------------------------------------------------------------------------------------------------------------------------------------------------------------------------------------------------------------------------------------------------------------------------------------------------------|
| Journal:                        | <i>BMJ Open</i>                                                                                                                                                                                                                                                                                                                                                                                                                                                                                                                                                                                                                                                                                                                                                                                                                                                                                                                                                                                                                                                                                                                          |
| Manuscript ID                   | bmjopen-2017-020649.R2                                                                                                                                                                                                                                                                                                                                                                                                                                                                                                                                                                                                                                                                                                                                                                                                                                                                                                                                                                                                                                                                                                                   |
| Article Type:                   | Research                                                                                                                                                                                                                                                                                                                                                                                                                                                                                                                                                                                                                                                                                                                                                                                                                                                                                                                                                                                                                                                                                                                                 |
| Date Submitted by the Author:   | 25-Mar-2018                                                                                                                                                                                                                                                                                                                                                                                                                                                                                                                                                                                                                                                                                                                                                                                                                                                                                                                                                                                                                                                                                                                              |
| Complete List of Authors:       | Ahmad, Noor Ani; Institute for Public Health, National Institutes of Health, Ministry of Health Malaysia<br>Silim, Umi Adzlin ; Hospital Kuala Lumpur, Ministry of Health Malaysia<br>Rosman, Azriman; Department of Public Health, Ministry of Health Malaysia<br>Mohamad, Majdah ; Department of Public Health, Ministry of Health Malaysia<br>Chan, Ying Ying; Institute for Public Health, Ministry of Health Malaysia<br>Mohd Kasim, Noraidda; Institute for Public Health, Ministry of Health Malaysia<br>Yusof, Muslimah; Institute for Public Health, Ministry of Health Malaysia<br>Abdul Razak, Aznuddin; Institute for Public Health, Ministry of Health Malaysia<br>Omar, Maisarah; Institute for Public Health, Ministry of Health Malaysia<br>Abdul Aziz, Fazly Azry; Institute for Public health, Ministry of Health Malaysia<br>Jamaluddin, Rasidah; institute for Public Health, Ministry of Health Malaysia<br>Ismail, Fatanah; Department of Public Health, Ministry of Health Malaysia<br>Ibrahim, Nurashikin; Department of Public Health, Ministry of Health Malaysia<br>Aris, Tahir; Institute for Public Health, |
| <b>Primary Subject Heading</b>: | Mental health                                                                                                                                                                                                                                                                                                                                                                                                                                                                                                                                                                                                                                                                                                                                                                                                                                                                                                                                                                                                                                                                                                                            |
| Secondary Subject Heading:      | Public health                                                                                                                                                                                                                                                                                                                                                                                                                                                                                                                                                                                                                                                                                                                                                                                                                                                                                                                                                                                                                                                                                                                            |
| Keywords:                       | MENTAL HEALTH, Depression & mood disorders < PSYCHIATRY, EPIDEMIOLOGY                                                                                                                                                                                                                                                                                                                                                                                                                                                                                                                                                                                                                                                                                                                                                                                                                                                                                                                                                                                                                                                                    |
|                                 |                                                                                                                                                                                                                                                                                                                                                                                                                                                                                                                                                                                                                                                                                                                                                                                                                                                                                                                                                                                                                                                                                                                                          |

SCHOLARONE™  
Manuscripts

1  
2  
3 **Postnatal depression and intimate partner violence: A nationwide clinic-based cross-**  
4 **sectional study in Malaysia**  
5  
6  
7  
8

9 Noor Ani Ahmad,<sup>1</sup> Umi Adzlin Silim,<sup>2</sup> Azriman Rosman,<sup>3</sup> Majdah Mohamad,<sup>3</sup> Chan Ying Ying,<sup>1</sup>  
10 Noraida Mohd Kasim,<sup>1</sup> Muslimah Yusof,<sup>1</sup> Aznuddin Abd Razak,<sup>1</sup> Maisarah Omar,<sup>1</sup> Fazly Azry  
11 Abd Aziz,<sup>1</sup> Rasidah Jamaludin,<sup>1</sup> Fatanah Ismail,<sup>3</sup> Nurashikin Ibrahim,<sup>3</sup> Tahir Aris.<sup>1</sup>  
12  
13  
14  
15  
16  
17  
18

19 <sup>1</sup>Institute for Public Health, Ministry of Health Malaysia  
20

21 <sup>2</sup>Hospital Kuala Lumpur, Ministry of Health Malaysia  
22

23 <sup>3</sup>Public Health Department, Ministry of Health Malaysia  
24  
25  
26  
27  
28  
29  
30  
31  
32

33 **List of Authors**  
34  
35  
36

37 Noor Ani Ahmad, MBBS, MPH  
38

39 Centre for Family Health Research  
40

41 Institute for Public Health  
42

43 Ministry of Health Malaysia  
44

45 Jln Bangsar,  
46

47 Kuala Lumpur, Malaysia  
48  
49  
50  
51  
52

53 Umi Adzlin Silim, MD, Mmed (Psychiatry)  
54

55 Department of Psychiatry  
56  
57  
58  
59  
60

1  
2  
3 Hospital Kuala Lumpur

4  
5 Kuala Lumpur, Malaysia

6  
7  
8  
9 Azriman Rosman, MBBS, MPH

10  
11 Department of Public Health

12  
13 Ministry of Health Malaysia

14  
15 Putrajaya, Malaysia

16  
17  
18  
19  
20  
21 Majdah Mohamad, MD, MPH

22  
23 Department of Public Health

24  
25 Ministry of Health Malaysia

26  
27 Putrajaya, Malaysia

28  
29  
30  
31  
32 Chan Ying Ying (MMedSc)

33  
34 Centre for Family Health Research

35  
36 Institute for Public Health

37  
38 Ministry of Health Malaysia

39  
40  
41 Jln Bangsar,

42  
43 Kuala Lumpur, Malaysia

44  
45  
46  
47  
48 Noraida Mohd Kasim, MSc (Nursing)

49  
50 Centre for Family Health Research

51  
52 Institute for Public Health

53  
54  
55 Ministry of Health Malaysia

1  
2  
3 Jln Bangsar,  
4  
5 Kuala Lumpur, Malaysia  
6  
7

8  
9 Muslimah Yusof, MSc (Nursing)  
10  
11 Centre for Family Health Research  
12  
13 Institute for Public Health  
14  
15 Ministry of Health Malaysia  
16

17  
18 Jln Bangsar,  
19  
20 Kuala Lumpur, Malaysia  
21  
22

23  
24  
25 Aznuddin Abd Razak, BSc  
26  
27 Centre for Family Health Research  
28  
29 Institute for Public Health  
30  
31 Ministry of Health Malaysia  
32  
33

34  
35 Jln Bangsar,  
36  
37 Kuala Lumpur, Malaysia  
38  
39

40  
41 Maisarah Omar, MD  
42  
43 Centre for Family Health Research  
44  
45 Institute for Public Health  
46  
47 Ministry of Health Malaysia  
48  
49

50  
51 Jln Bangsar,  
52  
53 Kuala Lumpur, Malaysia  
54  
55  
56  
57

1  
2  
3 Fazly Azry Abdul Aziz, MD

4  
5 Centre for Family Health Research

6  
7 Institute for Public Health

8  
9  
10 Ministry of Health Malaysia

11  
12 Jln Bangsar,

13  
14 Kuala Lumpur, Malaysia

15  
16  
17  
18 Rasidah Jamaluddin, Dip (Nursing)

19  
20  
21 Centre for Family Health Research

22  
23 Institute for Public Health

24  
25  
26 Ministry of Health Malaysia

27  
28 Jln Bangsar,

29  
30 Kuala Lumpur, Malaysia

31  
32  
33  
34 Fatanah Ismail, MD, MPH

35  
36  
37 Department of Public Health

38  
39  
40 Ministry of Health Malaysia

41  
42 Putrajaya, Malaysia

43  
44  
45  
46 Nurashikin Ibrahim, MBBS, MPH

47  
48  
49 Department of Public Health

50  
51  
52 Ministry of Health Malaysia

53  
54 Putrajaya, Malaysia

1  
2  
3 Tahir Aris, MD, MPH

4  
5 Institute for Public Health

6  
7 Ministry of Health Malaysia

8  
9 Jln Bangsar,

10  
11 Kuala Lumpur, Malaysia

12  
13  
14  
15  
16  
17  
18  
19  
20  
21 **Corresponding author**

22  
23 Dr Noor Ani Ahmad

24  
25 Centre for Family Health Research

26  
27 Institute for Public Health

28  
29 Ministry of Health Malaysia

30  
31 Jln Bangsar

32  
33 50590 Kuala Lumpur

34  
35 Malaysia

36  
37 Email: [drnoorani@moh.gov.my](mailto:drnoorani@moh.gov.my)/ [dr.ani1006@gmail.com](mailto:dr.ani1006@gmail.com)

38  
39 HP: +603-22979441

40  
41 Fax: +603-22823114

42  
43  
44  
45  
46  
47  
48 **Word count: 4197**

49  
50  
51  
52  
53 **Keywords:** depression, postpartum, intimate partner violence, family support

1  
2  
3 **Postnatal depression and intimate partner violence: A nationwide clinic-based cross-**  
4 **sectional study in Malaysia**  
5  
6  
7  
8

9 **ABSTRACT**  
10  
11  
12

13  
14 **Introduction**  
15

16 An estimated 13% of women in the postnatal period suffer from postnatal depression (PND)  
17 worldwide. In addition to under-privileged women, women who are exposed to violence are  
18 at higher risk of PND. This study aimed to investigate the relationship between intimate  
19 partner violence (IPV) and PND in Malaysia.  
20  
21  
22  
23  
24

25 **Methods**  
26

27 This survey was conducted as a nationwide cross-sectional study using a cluster sampling  
28 design. Probable PND was assessed using a self-administered Edinburgh Postnatal  
29 Depression Scale (EPDS). Demographic profiles and IPV were assessed using a locally  
30 validated WHO Multi-country Study on Women's Health and Life Events Questionnaire that  
31 was administered in a face-to-face interview. An EPDS total score of 12 or more and/or a  
32 positive tendency to self-harm were used to define PND.  
33  
34  
35  
36  
37  
38  
39  
40

41 **Results**  
42

43 Out of 6,669 women, 5,727 respondents were successfully interviewed with a response rate  
44 of 85.9%. The prevalence of probable PND was 4.4% (95%CI: 2.9, 6.7). The overall prevalence  
45 of IPV was 4.9% (95%CI: 3.8, 6.4). Among the women in this group, 3.7% (95%CI: 2.7, 5.0),  
46 2.6% (95%CI: 1.9, 3.5), and 1.2% (95%CI: 0.9, 1.7) experienced emotional, physical, and  
47 sexual violence, respectively. Logistic regression analysis revealed that women who were  
48 exposed to IPV were at 2.3 times the risk for probable PND, with an adjusted OR, aOR, of  
49  
50  
51  
52  
53  
54  
55  
56  
57

1  
2  
3 2.34 (95%CI: 1.12, 4.87). Other factors for PND were reported emotional violence (aOR: 3.79,  
4 95%CI: 1.93, 7.45), unplanned pregnancy (aOR: 3.32, 95%CI: 2.35, 4.69), lack of family  
5 support during confinement (aOR: 1.79, 95%CI: 1.12, 2.87), partner's use of alcohol (aOR:  
6 1.59, 95%CI: 1.07, 2.35), or being from a household with a low income (aOR: 2.99; 95%CI:  
7 1.63, 5.49).  
8  
9  
10  
11  
12  
13

### 14 **Conclusions**

15  
16 Exposure to IPV was significantly associated with probable PND. Health care personnel  
17 should be trained to detect and manage both problems. An appropriate referral system and  
18 support should be made available.  
19  
20  
21  
22  
23  
24  
25

26 **Keywords:** depression, postpartum, intimate partner violence, family support  
27  
28  
29

### 30 **Strength and limitations of this study**

- 31  
32 • A nationwide study using a cluster sampling design that allowed the findings of this  
33 study to be generalized to the overall Malaysian population as a majority of postnatal  
34 mothers seek care at government health facilities  
35  
36  
37  
38
- 39 • Objective assessment of the potential causes of postnatal depression using a locally  
40 validated, self-administered EPDS  
41  
42  
43
- 44 • Intimate partner violence, IPV, was assessed using locally validated questionnaires  
45  
46
- 47 • Postnatal depression was based on the screening tool and was not diagnostic  
48  
49  
50  
51  
52  
53  
54  
55  
56  
57  
58  
59  
60



## INTRODUCTION

The World Health Organization estimates that 13% of women in the postpartum period experience mental disorders, with depression being particularly common [1]. Depression has been observed to be higher in developing countries, ranging from 4.9% to 50.8% among mothers at four to eight weeks postpartum [2]. According to self-reported questionnaires, the prevalence of depression among Asian women is 23.7%, 16.5% and 17.4% at six weeks, three months, and six months after childbirth, respectively [3]. The prevalence in Malaysia varies based on the setting, with 20.7% in primary care settings [4] and 31.7% in hospital settings [5].

Postnatal depression (PND) generally occurs within four to six weeks of childbirth and presents with symptoms such as an upset mood, anhedonia, forgetfulness, irritability, anxiety, sleep disturbances, and poor functioning [6]. Various factors were found to be associated with PND. A young maternal age; low socioeconomic status; partner's habits, such as alcoholism; lack of education; marital conflict; unsupportive partner; and psychological factors, such as antenatal depression, stressful life events, or IPV are all associated with PND [2, 3]. While depression at any time in a woman's life is devastating, depression during the perinatal, antenatal and postnatal periods is of special importance and is a public health concern due to its detrimental effects on women, families and their children. It can lead to serious complications, such as maternal suicide, child abuse and neglect and an increased risk of the child having emotional and behavioural problems later in life [7-10].

1  
2  
3 Intimate partner violence (IPV) refers to any behaviour in an intimate relationship that  
4  
5 causes physical, psychological or sexual harm to those in the relationship. Such behaviour  
6  
7 includes acts of physical aggression, forced intercourse and other forms of sexual coercion  
8  
9 and various controlling behaviours [11]. IPV is associated with fatal and non-fatal health  
10  
11 effects, including homicide and suicide, as well as negative health behaviours during  
12  
13 pregnancy, poor reproductive outcomes and adverse physical and mental consequences  
14  
15 [12]. IPV has been described as one of the most important predictors for depression in  
16  
17 women. A review of studies exploring the determinants of PND in low- and lower-middle-  
18  
19 income countries reported an association between physical violence by intimate partners  
20  
21 and PND [13]. A household survey performed in Peninsular Malaysia revealed that 7.8% of  
22  
23 women were emotionally abused, 5.0% were physically abused and 1.7% were sexually  
24  
25 abused [14]. However, this survey only targeted adult women and not women in the  
26  
27 postpartum period.  
28  
29  
30  
31  
32  
33  
34

35 There is an existing theoretical and conceptual framework that describes the hierarchical  
36  
37 relationship between postnatal depression and its risk factors that is suitable for use in an  
38  
39 epidemiological study. The framework divides determinants into three levels: proximal,  
40  
41 intermediate and distal [15].  
42  
43  
44  
45

46 [INSERT FIGURE 1]  
47  
48  
49

50 Proximal determinants include violence and controlling behaviour from partners, and  
51  
52 intermediate determinants encompass both partner and family factors, including the role of  
53  
54 family support during confinement (**Figure 1**). 'Confinement' is widely practiced among  
55  
56  
57

1  
2  
3 Malaysian women after giving birth regardless of their socio-demographic and cultural  
4 differences. It is practiced due to a belief that it is beneficial to women's wellbeing [16].  
5  
6  
7 During this period, family support in the form of accompaniment and caring for the mother  
8  
9  
10 is crucial. These behaviours may be the key protective element against postnatal depression  
11  
12 rather than the ritual itself [16, 17].  
13  
14  
15

16 Although studies from several countries have shown a positive association between PND and  
17  
18 IPV, currently no study has investigated the relationship between these factors in Malaysia.  
19  
20  
21 Thus, this study aimed to determine the magnitude of PND in Malaysia and its associated  
22  
23 factors, with a particular focus on IPV. Though both conditions, PND and IPV, are pressing  
24  
25 public health concerns worldwide, they are generally undetected by perinatal care services  
26  
27 without proper screening programs and interventions in place.  
28  
29  
30  
31

## 32 **METHODS**

### 33 **Study design**

34  
35  
36  
37  
38  
39 This study was a nationwide clinic-based cross-sectional study. To ensure national  
40  
41 representativeness, a cluster sampling design was used.  
42  
43  
44  
45

### 46 **Setting**

47  
48  
49 The study was conducted at the Maternal and Child Health Unit at government primary care  
50  
51 clinics throughout Malaysia. Malaysia operates a dichotomous system with both public and  
52  
53 private sectors. The Ministry of Health serves as the main provider of health care services.  
54  
55  
56 Health facilities are well distributed, with a mean distance of 8.4 km [18]. The majority  
57  
58  
59  
60

1  
2  
3 (98.2%) of women consulted one-month after delivery with more than 80% of the children  
4  
5 received a primary vaccination at these government primary care clinics [19].  
6  
7  
8

### 9 10 **Participants**

11  
12 Women who were at 6-16 weeks postpartum and who registered at a government primary  
13  
14 care clinic for postnatal care and/or child immunization were eligible to be included in the  
15  
16 sampling frame. Women who did not register and/or were unable to communicate in either  
17  
18 English or *Bahasa Malaysia* were not eligible.  
19  
20  
21  
22

### 23 **Recruitment strategies**

24  
25 Sampling was performed by a resident statistician who was not directly involved in this  
26  
27 study. Sampling was conducted using a two-stage random sampling design. The first stage  
28  
29 used the sampling frame of all government primary care clinics in Malaysia. These clinics,  
30  
31 considered to be clusters, were then randomly selected using the systematic probability  
32  
33 proportionate to the size sampling technique. For the second stage, the sampling frame was  
34  
35 formed from women between 6 and 16 weeks postpartum who registered for a postnatal  
36  
37 care and/or child immunization at the randomly selected clinics and who were given  
38  
39 consultation appointments between 1 June and 30 October 2016. The number of women  
40  
41 selected from each state was then determined in proportion to the number of registered  
42  
43 women. The clinic-based cards containing the women's profiles and the appointment dates  
44  
45 were extracted and tagged to indicate eligible respondents.  
46  
47  
48  
49  
50  
51  
52

53  
54 The women were invited to join the study on the day of their appointment date. The women  
55  
56 were given an Information Sheet and Consent Form by trained nurses at the registration  
57  
58  
59  
60

1  
2  
3 counter. Those who consented to participate in the study were called into a private room  
4  
5 within the clinic without their partners and were then given the self-administered Edinburgh  
6  
7 Postnatal Depression Scale (EPDS) for assessment of PND [20, 21]. Upon completion of the  
8  
9 screening, the trained nurses conducted a face-to-face interview in the same private room  
10  
11 using the WHO Multi-country Study on Women's Health and Life Events questionnaire [22].  
12  
13 The questionnaire also included a few additional questions based on the variables in the  
14  
15 conceptual framework. The added questions were tested for face validity before being used  
16  
17 in this study.  
18  
19  
20  
21  
22

23 Two nurses per selected clinic were given a five-day training on interview techniques and  
24  
25 were trained to handle PND and IPV, including the management and referral processes. The  
26  
27 potential risk of interviewer bias was minimized by assessing interviewer skills during role-  
28  
29 play sessions and ad-hoc supervision at the clinics by the research team members. The entire  
30  
31 questionnaire, except the EPDS, was installed as web-based application into a mobile device  
32  
33 with a built-in quality assessment feature and was administered as a computer-assisted  
34  
35 personal interview. The responses from EPDS were manually entered into the application  
36  
37 after the interview session ended. Data collection took place from 1 June through October  
38  
39 2016.  
40  
41  
42  
43  
44  
45

#### 46 **Patient and public involvement**

47  
48 Patients and public were not involved in either the development of the research question,  
49  
50 study design or recruitment process. Patients who were detected as having probable PND  
51  
52 or IPV were referred for appropriate management by the Family Physician at the respective  
53  
54 clinics.  
55  
56  
57

## Variables

### Outcome variables

The main outcome of this study, probable postnatal depression (PND), was assessed using a self-administered locally validated Edinburgh Postnatal Depression Scale, EPDS. This scale is composed of 10 statements on common depressive symptoms that use Likert-type responses (0-3 scores) that reflect the severity of symptoms. Wan Mahmud et al found that, at a cut-off score of 11/12, the sensitivity and specificity of the EPDS were 100% and 98.18%, respectively [20]. Another validation study recommended a cut-off score of 11.5 with a sensitivity of 72.7% and specificity of 92.6% [21]. In the first study, EPDS was tested against the ICD-10 criteria, with assessment of its concurrent validity against the Malay version of the General Health Questionnaire and the Hamilton Depression Rating Scale (HDRS) score [20]. The second study was tested and showed good correlations with both the Malay version of the Beck-Depression Inventory and HDRS [21]. Based on these two studies and a consensus from the content expert, this study categorized women who had a total score of 12 or more and/or a positive response to Question 10 on the risk of self-harm in the EPDS as having probable postnatal depression.

### Predictor variables

Intimate partner violence (IPV) was defined as a single or repeated experience of physical and/or sexual violence. IPV was assessed based on the questionnaire used in the WHO Multi-country Study on Women's Health and Life Events [23]. In this study, we used a locally validated questionnaire from Saddki et al that reported Cronbach's  $\alpha$  values ranging from 0.767 to 0.858 across domains [22]. Using this questionnaire, four types of violent

1  
2  
3 behaviours were assessed; physical, sexual, emotional violence and controlling behaviour.  
4  
5 Physical violence was defined as positive responses to a history of being slapped, pushed,  
6  
7 beaten, kicked, choked, or threatened with a weapon, and sexual violence was defined as a  
8  
9 positive response for any history of sexual coercion, sex out of fear, or forced to engage in a  
10  
11 degrading sexual act. Emotional violence was defined as a positive response to ever having  
12  
13 been insulted, publicly humiliated, intimidated or threatened or had a partner who  
14  
15 threatened to hurt the respondent herself or someone she cared about. Controlling  
16  
17 behaviour was defined as a positive response to ever having been kept away from friends  
18  
19 and/or immediate family, partner insisting on knowing the participant's whereabouts at all  
20  
21 times, treated indifferently, partner feeling angry if the participant spoke to another man,  
22  
23 partner suspicious of the participant being unfaithful and/or expected permission to seek  
24  
25 healthcare for herself by their former or present husbands/partners. In this study, emotional  
26  
27 violence and controlling behaviours were considered to be possible predictors for PND, and  
28  
29 not part of IPV.  
30  
31  
32  
33  
34  
35  
36

37 Other important predictors of PND are a lack of family support and unplanned pregnancy.  
38  
39 Family support during confinement was defined as an answer of "Yes" to the questions "Did  
40  
41 you observe a confinement period after your last child birth?" and "When you need help or  
42  
43 have a problem, can you usually count on family members for support?" The response to the  
44  
45 question "Was your last pregnancy planned or unplanned?" was used to categorize the  
46  
47 pregnancy as planned or unplanned.  
48  
49  
50  
51  
52

53 Possible confounding variables included age, ethnicity, marital status, education level,  
54  
55 occupation and household income. Age was grouped into four categories: 18-24 years, 25-29  
56  
57

1  
2  
3 years, 30-34 years and 35 years and greater. Ethnicity was classified based on the major  
4  
5 ethnic groups in Malaysia: Malay, Malaysian Chinese and Malaysian Indian and was followed  
6  
7 by 'Other Bumiputera' and 'Other'. Other Bumiputera was composed of indigenous groups  
8  
9 and local Sabahans and Sarawakians, and 'Other' was mostly composed of foreigners,  
10  
11 immigrants, both legal and illegal, residing in Malaysia.  
12  
13  
14  
15

16 The education levels were categorized based on the Malaysian education system.  
17  
18 Respondents were considered to have no formal education/primary education if they had  
19  
20 not attended any formal schooling or had only completed up to six years of primary school.  
21  
22 Those who had completed 11 years of formal schooling were defined as having completed  
23  
24 secondary education while respondents with diplomas or higher qualifications were  
25  
26 considered as having completed tertiary education. Household income was calculated based  
27  
28 on the pooled income of family members and categorized into four groups.  
29  
30  
31  
32  
33  
34

### 35 **Sample size**

36  
37 To the best of our knowledge, there is currently no information on the prevalence of IPV  
38  
39 among women during the postnatal period in Malaysia. Thus, the sample size in this study  
40  
41 was determined based on three available sources: a 20.7% prevalence of probable PND in  
42  
43 Malaysia [4], 8.0% prevalence of IPV in Malaysia [14], and 35.2-38.9% prevalence of family  
44  
45 violence among women with probable perinatal depression taken from a systematic review  
46  
47 [24]. To ensure an adequate sample size, the sample size was calculated based on the lowest  
48  
49 prevalence (8.0%) using a single proportion formula to estimate prevalence. Additionally,  
50  
51 based on a design effect of 2 and an estimated non-response rate of 20%, the required  
52  
53 sample size was 6,639 women.  
54  
55  
56  
57



## Data management and analysis

Data from mobile devices were automatically uploaded into the server at the institute and converted into CSV and SPSS files. Only data with complete responses on the EPDS module were used for analysis. Data were analysed using the complex sample module in the IBM Statistical Package of Social Sciences (SPSS) for Windows version 23.0 (IBM Corp., Armonk, NY, USA) to account for the complexity of the sampling design. The final weights were calculated based on design weight and non-response weight, and a plan for analysis was created. Categorical variables were defined based on the variable operating definitions. Using the complex sample module, the overall prevalence of PND and estimated population affected by it were determined. Bivariate analysis was conducted to determine the factors associated with PND. Crude odds ratios were used to describe the strength of the associations between dependent and independent variables. A multivariable logistic regression model was fitted to determine the factors associated with PND. The primary predictor was IPV (physical and/or sexual violence). Other included independent variables were emotional violence, controlling behaviours, family support during confinement, unplanned pregnancy and partner's use of alcohol. Other possible confounders, such as ethnicity, respondent's age, marital status, education level, occupation and household income, were also included. We used a logistic regression model to produce a crude odds ratio as a measure of the associations between PND and the independent variables. For the final model, a FORWARD LR variable selection method was used to identify significant variables. Only variables with  $p$ -values less than 0.25 were included. The statistical significance of the individual regression coefficients was tested using the Wald chi-square statistic. The adjusted OR, with the respective 95% confidence intervals (CIs), was then

1  
2  
3 calculated. A p-value of less than 0.05 was considered significant. The model fit was tested  
4  
5 using the Hosmer-Lemeshow statistic, which was non-significant ( $p>0.05$ ).  
6  
7  
8

### 9 10 **Ethics**

11 Approval from the Medical Research and Committee, Ministry of Health Malaysia was  
12  
13 obtained prior to the implementation of this study (NMRR-15-2404-26677). All participants  
14  
15 gave their informed consent before participating. Identifiable data were not entered into the  
16  
17 mobile device. Women who were found to be positive for EPDS and/or positive for any type  
18  
19 of violence were referred to the Family Physician at the respective clinics for further  
20  
21 management.  
22  
23  
24  
25  
26  
27

### 28 **RESULTS**

29  
30 Out of 6,639 randomly selected respondents, 5,745 were successfully interviewed, but only  
31  
32 5,727 completed the EPDS questions, resulting in a response rate of 85.9%. A total of 442  
33  
34 respondents did not attend clinic appointments, were non-contactable, or moved out of the  
35  
36 clinic's operation area during their eligibility period (6-16 weeks postpartum). Another 452  
37  
38 respondents refused to participate, and 18 respondents had incomplete EPDS data (**Figure**  
39  
40 **2**). No differences were found between the age, ethnicity or sex of respondents and non-  
41  
42 respondents.  
43  
44  
45  
46  
47

48 [INSERT FIGURE 2]  
49  
50  
51  
52

53 We used data from 5,727 respondents in the analysis. The majority of respondents were  
54  
55 between 25 and 35 years of age. The majority of respondents were married and had  
56  
57

attained at least a secondary education level, and half of the respondents were working mothers (**Table 1**).

**Table 1: Sociodemographic profile of the respondents (n=5727)**

|                                | Unweighted count | Percentage (%) |
|--------------------------------|------------------|----------------|
| <b>Age</b>                     |                  |                |
| 18-24                          | 1043             | 18.2           |
| 25-29                          | 1842             | 32.2           |
| 30-34                          | 1749             | 30.5           |
| 35 and above                   | 1093             | 19.1           |
| <b>Ethnic</b>                  |                  |                |
| Malay                          | 3889             | 67.9           |
| Malaysian Chinese              | 549              | 9.6            |
| Malaysian Indians              | 262              | 4.6            |
| Other Bumiputeras              | 753              | 13.1           |
| Others                         | 274              | 4.8            |
| <b>Marital Status</b>          |                  |                |
| Married/has partner            | 5654             | 98.7           |
| Not married/no current partner | 73               | 1.3            |
| <b>Education status</b>        |                  |                |
| No formal/ Primary             | 382              | 7.2            |
| Secondary                      | 3300             | 60.0           |
| Tertiary                       | 2045             | 32.8           |

**Occupation**

|         |      |      |
|---------|------|------|
| Working | 2807 | 49.0 |
|---------|------|------|

|                        |      |      |
|------------------------|------|------|
| Not working/ Housewife | 2920 | 51.0 |
|------------------------|------|------|

**Household income\***

|                  |      |      |
|------------------|------|------|
| Less than RM1500 | 1575 | 27.5 |
|------------------|------|------|

|               |      |      |
|---------------|------|------|
| RM1501-RM3000 | 1879 | 32.8 |
|---------------|------|------|

|               |      |      |
|---------------|------|------|
| RM3001-RM5000 | 1308 | 22.9 |
|---------------|------|------|

|                 |     |      |
|-----------------|-----|------|
| RM5001 and more | 958 | 16.7 |
|-----------------|-----|------|

---

\*missing data=7; 1USD= RM3.89 (currency exchange on 3 February 2018).

**Prevalence of probable postnatal depression**

The prevalence of probable PND among women at 6-16 weeks postpartum was 4.4% (95% Confidence Interval, CI: 2.9, 6.7). There was no difference in prevalence in different age groups. The prevalence was higher among 'other Bumiputeras' and 'other' ethnicities compared to the Malays. Women who were unmarried, had a low education status, were not working and had low household incomes had a higher prevalence of probable PND. Women with partners who consumed alcohol, those with unplanned pregnancy and those without family support during confinement were also found to have a higher prevalence (Table 2).

**Table 2: Factors associated with probable postnatal depression (n=5727)**

| Variables | Prevalence<br>(95% CI) | Crude OR<br>(95% CI) |
|-----------|------------------------|----------------------|
|-----------|------------------------|----------------------|

|    |                          |                       |                  |                   |
|----|--------------------------|-----------------------|------------------|-------------------|
| 1  |                          |                       |                  |                   |
| 2  |                          |                       |                  |                   |
| 3  | Respondent's age         | 18-24                 | 6.9 (3.8, 12.4)  | 1.49 (0.96, 2.13) |
| 4  |                          |                       |                  |                   |
| 5  | (years)                  | 25-29                 | 4.6 (3.0, 7.2)   | 0.93 (0.63, 1.37) |
| 6  |                          |                       |                  |                   |
| 7  |                          | 30-34                 | 3.1 (1.9, 4.8)   | 0.69 (0.45, 1.04) |
| 8  |                          |                       |                  |                   |
| 9  |                          | 35 and above          | 4.0 (2.2, 7.1)   | R                 |
| 10 |                          |                       |                  |                   |
| 11 | Ethnicity                | Malay                 | 3.7 (2.5, 5.5)   | R                 |
| 12 |                          |                       |                  |                   |
| 13 |                          | Malaysian Chinese     | 1.7 (0.8, 3.7)   | 0.69 (0.38, 1.26) |
| 14 |                          |                       |                  |                   |
| 15 |                          | Malaysian Indian      | 4.5 (2.0, 9.7)   | 1.48 (0.81, 2.72) |
| 16 |                          |                       |                  |                   |
| 17 |                          | Other Bumiputeras     | 9.1 (3.6, 20.9)  | 2.63 (1.90, 3.62) |
| 18 |                          |                       |                  |                   |
| 19 |                          | Others                | 5.1(2.3, 10.5)   | 1.92 (1.12, 3.27) |
| 20 |                          |                       |                  |                   |
| 21 | Marital Status (current) | Married/Has partner   | 4.2 (2.7, 6.5)   | R                 |
| 22 |                          |                       |                  |                   |
| 23 |                          | Unmarried/ no current | 17.6 (7.1, 37.5) | 3.14 (1.49, 6.64) |
| 24 |                          | partner               |                  |                   |
| 25 |                          |                       |                  |                   |
| 26 | Education level          | No formal/ Primary    | 8.9 (3.5, 20.9)  | 2.46 (1.53, 3.95) |
| 27 |                          | education             |                  |                   |
| 28 |                          |                       |                  |                   |
| 29 |                          | Secondary education   | 4.7 (3.1, 6.9)   | 1.45 (1.06, 1.97) |
| 30 |                          |                       |                  |                   |
| 31 |                          | Tertiary education    | 2.9 (1.8, 4.6)   | R                 |
| 32 |                          |                       |                  |                   |
| 33 | Occupation               | Working               | 2.5 (1.5, 4.1)   | R                 |
| 34 |                          |                       |                  |                   |
| 35 |                          | Not working/housewife | 6.1 (3.9, 9.5)   | 1.88 (1.42, 2.49) |
| 36 |                          |                       |                  |                   |
| 37 | Household income         | Lower than RM1500     | 8.5 (5.0, 13.9)  | 3.75 (2.29, 6.14) |
| 38 |                          |                       |                  |                   |
| 39 |                          | RM1500-RM3000         | 3.4 (2.3, 5.0)   | 1.74 (1.04, 2.93) |
| 40 |                          |                       |                  |                   |
| 41 |                          | RM3001-RM5000         | 2.2 (1.2, 3.9)   | 1.00 (0.55, 1.82) |
| 42 |                          |                       |                  |                   |
| 43 |                          | RM5001 and more       |                  | R                 |
| 44 |                          |                       |                  |                   |
| 45 | Unplanned pregnancy      | Yes                   | 11.5 (5.6, 22.2) | 4.19 (3.10-5.67)  |
| 46 |                          |                       |                  |                   |
| 47 |                          |                       |                  |                   |
| 48 |                          |                       |                  |                   |
| 49 |                          |                       |                  |                   |
| 50 |                          |                       |                  |                   |
| 51 |                          |                       |                  |                   |
| 52 |                          |                       |                  |                   |
| 53 |                          |                       |                  |                   |
| 54 |                          |                       |                  |                   |
| 55 |                          |                       |                  |                   |
| 56 |                          |                       |                  |                   |
| 57 |                          |                       |                  |                   |
| 58 |                          |                       |                  |                   |
| 59 |                          |                       |                  |                   |
| 60 |                          |                       |                  |                   |

|                        |             |     |                   |                     |
|------------------------|-------------|-----|-------------------|---------------------|
|                        | No          |     | 2.7 (1.7, 4.1)    | R                   |
| Partner's              | consumed    | Yes | 5.6 (3.3, 9.4)    | 1.71 (1.20, 2.42)   |
| alcohol                | No          |     | 3.5 (2.2, 5.5)    | R                   |
| Lack of family support | Yes         |     | 10.8 (6.2, 18.1)  | 2.80 (1.96, 3.99)   |
| during confinement     | No          |     | 3.8 (2.5, 5.7)    | R                   |
| Emotional violence     | Yes         |     | 27.1 (18.1, 38.4) | 8.94 (6.21, 12.87)  |
|                        | No          |     | 3.5 (2.2, 5.8)    | R                   |
| Physical violence      | Yes         |     | 29.7 (19.4, 42.6) | 7.50 (4.75, 11.83)  |
|                        | No          |     | 3.7 (2.3, 6.0)    | R                   |
| Sexual violence        | Yes         |     | 43.8 (27.9, 61.1) | 15.10 (8.91, 25.60) |
|                        | No          |     | 3.9 (2.4, 6.2)    | R                   |
| Partner's              | controlling | Yes | 7.2 (5.0, 10.1)   | 2.31 (1.76, 3.03)   |
| behaviour              | No          |     | 3.2 (1.7, 6.1)    | R                   |
| IPV*                   | Yes         |     | 32.6 (22.8, 44.1) | 9.32 (6.29, 13.82)  |
|                        | No          |     | 3.5 (2.1, 5.7)    | R                   |

CI= Confidence interval, OR= Odds Ratio; IPV: ever experienced physical and/or sexual violence

1USD= RM3.89 (currency exchange on 3 February 2018).

### Prevalence of intimate partner violence

For partner violence, 3.7% (95% CI: 2.7, 5.0), 2.6% (95% CI: 1.9, 3.5) and 1.2% (95% CI: 0.9, 1.7) of women had ever experienced emotional, physical or sexual violence, respectively.

Controlling behaviour was experienced by 30.2% (95% CI: 24.2, 36.9) of women. Most of the violence occurred as combinations of emotional, sexual, and physical violence. Analyses

showed that 1.7%, 0.7%, and 0.5%, reported experiencing only emotional violence, only physical violence, and only sexual violence, respectively. Ever experiencing intimate partner sexual and/or physical violence was reported by 3.3% (95% CI: 2.5, 4.3) of women.

### Factors associated with probable postnatal depression

Multivariate analysis proved the relationship between IPV and probable PND. The odds of having probable PND doubled for women who had ever experienced IPV (adjusted Odds Ratio, aOR, 2.34; 95% CI: 1.12, 4.87) after controlling for age, marital status, ethnicity, education level, occupation and partner's controlling behaviour. Probable PND was almost four times higher among women who had ever experienced emotional violence (aOR: 3.79; 95% CI: 1.93, 7.45) after controlling for other variables. Additionally, probable PND was three times higher in women with unplanned pregnancies (aOR: 3.32; 95% CI: 2.35, 4.69), 79% higher among those who lacked family support during confinement (aOR: 1.79; 95% CI: 1.12, 2.87), 59% higher among those who reported partner alcohol consumption (aOR: 1.59, 95% CI: 1.07, 2.35) and was three times higher in women with household incomes of less than RM1500 (aOR: 2.99; 95% CI: 1.63, 5.49) compared to those earned more than RM5000 (Table 3).

**Table 3: Multivariate analysis of the factors associated with probable postnatal depression (n=5727)**

| Variables                     | Wald  | Adjusted OR<br>(95% CI) | p value |
|-------------------------------|-------|-------------------------|---------|
| Intimate Partner Violence Yes | 5.141 | 2.34 (1.12, 4.87)       | 0.023   |

|                                           |                   |        |                   |        |  |
|-------------------------------------------|-------------------|--------|-------------------|--------|--|
|                                           | No                |        |                   | R      |  |
| Emotional Violence                        | Yes               | 14.935 | 3.79 (1.93, 7.45) | <0.001 |  |
|                                           | No                |        |                   | R      |  |
| Unplanned pregnancy                       | Yes               | 46.591 | 3.32 (2.35, 4.69) | <0.001 |  |
|                                           | No                |        |                   | R      |  |
| Lack of family support during confinement | Yes               | 5.999  | 1.79 (1.12, 2.87) | 0.014  |  |
|                                           | No                |        |                   | R      |  |
| Partner consumed alcohol                  | Yes               | 5.351  | 1.59 (1.07, 2.35) | 0.021  |  |
|                                           | No                |        |                   | R      |  |
| Household income                          | Lower than RM1500 | 12.438 | 2.99 (1.63, 5.49) | <0.001 |  |
|                                           | RM1500-RM3000     | 3.459  | 1.82 (0.97, 3.41) | 0.063  |  |
|                                           | RM3001-RM5000     | 0.054  | 1.09 (0.53, 2.23) | 0.816  |  |
|                                           | RM5001 and more   |        |                   | R      |  |

---

CI= Confidence interval, OR= Odds Ratio,

Controlled for age, marital status, education level, occupation, ethnic and partner's controlling behaviour

## DISCUSSION

To our knowledge, this is the first study to investigate the relationship between probable PND and IPV using a large number of respondents in Malaysia. This study examined the factors associated with probable PND, with IPV being the main predictor. An earlier population-based study observed that IPV was a significant public health concern in Malaysia [14], and studies on PND have also demonstrated its importance [4, 5]. Our study clearly



1  
2  
3 demonstrated the relationship between these two problems, which has implications for  
4  
5 planning future services and intervention strategies.  
6  
7

### 8 9 **Prevalence of probable postnatal depression**

10  
11 The prevalence of probable PND (4.4%) in our study was lower than that reported in an  
12  
13 earlier study conducted in Kelantan, one of the states in Malaysia (20.3%) [4]. Both studies  
14  
15 were conducted at primary care clinics and used similar screening tools with similar cut-off  
16  
17 scores, but targeted women at different times during the postpartum period. Our  
18  
19 nationwide study targeted women at 6-16 weeks postpartum, while the Kelantan study  
20  
21 targeted women at 4-6 weeks postpartum. The difference in the prevalence might be due to  
22  
23 the different screening timings. Longitudinal studies have reported that incidence rates  
24  
25 decrease over the postpartum period [25, 26]. Accordingly, the prevalence in this study was  
26  
27 also lower than that reported by an earlier nationwide household survey conducted in  
28  
29 Malaysia using a similar screening tool and target population. This earlier survey reported a  
30  
31 prevalence of probable postnatal depression of 12.7% [27]. Another possible reason for the  
32  
33 lower prevalence in this study was the reluctance of women to disclose their problem,  
34  
35 possibly due to a fear of being stigmatized. The clinic environment may not have been  
36  
37 conducive for conducting a study examining sensitive issues. Postnatal depression and  
38  
39 intimate partner violence are relatively hidden in our community, and it is possible that we  
40  
41 would have observed a higher prevalence if we had been able to create awareness and  
42  
43 desensitize the issues before beginning this study. However, the prevalence found by this  
44  
45 study is comparable to that reported by a study in Indonesia (6.6%) among women at 6  
46  
47 weeks postpartum that used a similar cut-off score as well as a study conducted in Singapore  
48  
49 (6.8%) among a similar target group but that used a lower cut-off score[2].  
50  
51  
52  
53  
54  
55  
56  
57

### **Association between intimate partner violence and probable postnatal depression**

Our study demonstrated a significant association between probable PND and IPV (defined as a single occurrence of/repeated physical and/or sexual violence). This finding concurs with previous studies that recorded the independent effect of IPV with PND [24, 28-32]. The effect of IPV on women's mental health was not related to the time of occurrence. Khalifa et al described a history of violence as the strongest determinant of PND [28], while studies in France and Bangladesh have supported an association between PND and experiencing IPV before or during pregnancy [31, 32]. A prospective study among Norwegian mothers also showed higher risks of PND among women with a history of exposure to adult abuse, including sexual abuse [33]. We also recorded a strong association between emotional violence and the occurrence of probable PND, even after adjusting for partner's controlling behaviour and other confounding variables. The psychological effects of emotional violence on PND was more prominent than those of IPV, which has also been seen in other studies [34-37]. Emotional violence has a negative impact on the emotional and mental health of women in the postpartum period and often contributes to physical or sexual violence [38].

### **Other factors associated with probable postnatal depression**

Other than IPV, we also noted an increased likelihood of probable PND among mothers from low income families, those with partners who consumed alcohol and those who experienced a lack of support during confinement. Financial difficulties have been identified as a risk factor for PND, independent of IPV [13, 30, 39]. The association of PND to partner substance use was also observed in a Canadian study [39]. Substance use by husbands/partners is often associated with IPV, which may contribute to the PND problem in women [28]. Family

1  
2  
3 support during confinement is very important in Asian communities. Our study  
4  
5 demonstrated that a lack of family support during confinement is independently associated  
6  
7 with an increased likelihood of PND. Our findings concur with other studies that have  
8  
9 demonstrated similar associations [13, 40, 41]. A study from China concluded that a lack of  
10  
11 postnatal family support, particularly support from the husband, is an important risk factor  
12  
13 for PND [42]. We observed that marital status, the education level and occupation do not  
14  
15 contribute directly to PND. As in many Asian countries, women in Malaysia are primarily  
16  
17 expected to care for children and manage household chores, as prescribed by traditional  
18  
19 gender roles, regardless of whether they are working [43]. These cultural norms may assign  
20  
21 an inferior status to women and lead to misconceptions that may cause women to blame  
22  
23 themselves, minimize abuse and prevent them from seeking help when abuse occurs.  
24  
25 Perpetrators may manipulate cultural practices or religious teachings to make it seem as if  
26  
27 it supports IPV. Many women struggle because they believe that their husbands have the  
28  
29 right to beat them, a belief originating from misinterpreted religious teachings [44]. By  
30  
31 contrast, women in Malaysia are more empowered, as evidenced by the increasing number  
32  
33 of educated women and women in the workforce, and this may challenge the traditional  
34  
35 view of gender roles [43]. The stronger affiliation to religion and its true teaching among  
36  
37 Asians can have a protective effect against IPV, as religion promotes general commitment to  
38  
39 family life, regards the institution of marriage highly and provides an understanding of  
40  
41 women's rights [44]. Interestingly, a large prevalence study on IPV in Malaysia found that  
42  
43 83% of women who experienced IPV were assertive in seeking help for their survival in  
44  
45 abusive relationships rather than continuing to suffer in silence [45].  
46  
47  
48  
49  
50  
51  
52  
53  
54

### 55 **Strengths and limitations**

56  
57

1  
2  
3 The main strength of our study is its use of large nationally representative data with robust  
4  
5 methods. Moreover, the response rate was relatively high (85.9%) despite the sensitive  
6  
7 nature of the issue. We also examined various socio-demographic and socio-cultural factors.  
8  
9 Most importantly, this study used an internationally recognized tool that was locally  
10  
11 validated and data collectors received a standardized training. Nevertheless, our findings  
12  
13 have several limitations. One of the limitation of this study was the cross-sectional nature of  
14  
15 the study, which prevents the determination of temporal relationships between exposure to  
16  
17 IPV and probable PND. Although this study adjusted for a substantial number of possible  
18  
19 confounders, some important variables were not studied, such as birth complications, child  
20  
21 morbidity and breastfeeding. Additionally, we were only able to identify probable PND using  
22  
23 a screening tool without further diagnostic confirmation process. It is also acknowledged  
24  
25 that 'postnatal depression' is an umbrella term rather than a distinct psychological state. The  
26  
27 term "postpartum depression" encompasses several mood disorders that follow childbirth,  
28  
29 including anxiety disorders, trauma and adjustment reactions [46]. This broad spectrum of  
30  
31 perinatal mental health may be associated with different sets of risk factors that may or may  
32  
33 not overlap with each other, thus confounding the outcome of this study. Furthermore, the  
34  
35 WHO tool used to identify IPV, while used widely, may not be exhaustive in terms of types of  
36  
37 violence it identifies, which may have underestimated the prevalence of IPV in this study.  
38  
39 However, despite these limitations, this study was able to provide a baseline and offers  
40  
41 insight into the association between IPV and probable PND in Malaysia.  
42  
43  
44  
45  
46  
47  
48  
49  
50

## 51 **CONCLUSION AND POLICY IMPLICATIONS**

52  
53 Higher odds of probable PND were observed among women with a history of IPV. Women  
54  
55 who were exposed to emotional violence, those with husbands who consumed alcohol,  
56  
57

1  
2  
3 those with a lack of family support during confinement and those from low income families  
4  
5 were also at-risk of PND. Pregnancy care and postnatal programmes must address issues  
6  
7 related to PND and IPV as there is overwhelming evidence of adverse health effects for both  
8  
9 the mother and child. Healthcare personnel must be professionally trained to detect and  
10  
11 confidently communicate these issues. There must be a proper setting as well as trained  
12  
13 personnel to provide help and proper counselling or referrals for these women. Issues  
14  
15 pertaining to sexual and reproductive health, women's rights and violence should be  
16  
17 incorporated into the well-established pre-marital course [47]. Courses on family values and  
18  
19 parenting skills for young couples and parents could be another platform.  
20  
21  
22  
23  
24

### 25 26 **Acknowledgements**

27  
28 The authors wish to thank the Director General of Health Malaysia for his permission to  
29  
30 publish this article. Our gratitude to the Asia Pacific International Research and Education  
31  
32 (ASPIRE) Network, for their contribution to the concept of this study.  
33  
34  
35  
36

### 37 38 **Authors' contribution**

39  
40 NAA, UAS, and TA were responsible for the study design and concept. NAA was responsible  
41  
42 for the study conduct, respondent selection, study implementation, data analysis, data  
43  
44 interpretation, drafting, critical revision and final approval of the manuscript. UAS, AR, MM  
45  
46 and CY were responsible for drafting, critical revision and final approval of the manuscript.  
47  
48 NMK, MY, AAR, MO, FAAA, and RJ were responsible for respondent recruitment, data  
49  
50 collection, data entry, critical revision and final approval of the manuscript. FI and NI were  
51  
52 responsible for data interpretation, critical revision and final approval of the manuscript.  
53  
54  
55  
56  
57  
58  
59  
60

**Funding**

This study was supported by Ministry of Health Research Grant (NMRR-15-2404-26677).

**Competing interest statement**

All of the authors declare no conflict of interest

**Patient consent**

All of the respondents consented to participate in this study

**Data sharing statement**

The data used for this study are not publicly available. However, the data are available from the corresponding author upon reasonable request and with permission of the Director General of Health Malaysia.

**Figures:**

Figure 1: Conceptual framework illustrating the hierarchical model of risk factors for postnatal depression

Figure 2: Flow diagram of respondent recruitment

**REFERENCES:**

- 1  
2  
3 1. World Health Organization. Mental Health: Maternal mental health.  
4  
5 [http://www.who.int/mental\\_health/maternal-child/maternal\\_mental\\_health/en/](http://www.who.int/mental_health/maternal-child/maternal_mental_health/en/)  
6  
7 accessed on 15 May 2017.  
8
- 9  
10 2. Norhayati MN, Nik Hazlina NH, Asrene AR, et al. Magnitude and risk factors for  
11  
12 postpartum symptoms: a literature review. *J. Affect. Disord.* 2015;175:34-52  
13
- 14 3. Roomruangwong C, Epperson CN. Perinatal depression in Asian women: prevalence,  
15  
16 associated factors, and cultural aspects. *Asian Biomed.* 2011;5(2):179-193.  
17
- 18 4. Kadir AA, Nordin R, Ismail SB, et al. Postnatal depression in mothers attending  
19  
20 primary care clinics in Kelantan, Malaysia. *International Medical Journal.* 2005;  
21  
22 12(2):105-109.  
23
- 24 5. Ariffin Siti RM, Ahmad A, Rahman RA, et al. Postpartum depression in Malaysian  
25  
26 women: the association with the timing of pregnancy and sense of personal control  
27  
28 during childbirth. *Int.J. Acad.Res.* 2014;6(3):143-149.  
29
- 30 6. American Psychiatric Association: Diagnostic and statistical manual of mental  
31  
32 disorders (5th Edition). Washington, DC, 2000.  
33
- 34 7. Paris R, Bolton RE, Weinberg MK. Postpartum depression, suicidality, and mother-  
35  
36 infant interactions. *Arch Womens Ment Health.* 2009;12:309-321.  
37
- 38 8. American Academy of Pediatrics. Clinical report - incorporating recognition and  
39  
40 management of perinatal and postpartum depression into Pediatric practice.  
41  
42 [www.pediatrics.org/cgi/doi/10.1542/peds.2010-2348](http://www.pediatrics.org/cgi/doi/10.1542/peds.2010-2348).  
43  
44
- 45 9. Pearson RM, Evans J, Kounali D, et al. Maternal depression during pregnancy and the  
46  
47 postnatal period. Risk and possible mechanisms for offspring depression at age 18  
48  
49 years. *JAMA Psychiatry.* 2013;70(12):1312-1319.  
50  
51  
52  
53  
54  
55  
56  
57

- 1  
2  
3 10. Murray L, Arteche A, Fearon P, et al. Maternal postnatal depression and the  
4  
5 development of depression in offspring up to 16 years of age. *J Am. Acad. Child*  
6  
7 *Adolesc Psychiatry*. 2011;50(5):460-470.  
8
- 9  
10 11. Krug EG, Mercy JA, Dahlberg LL, et al. The World Report on Violence and Health.  
11  
12 *Lancet*. 2002;360(9339):1083-8  
13
- 14 12. Department of Reproductive Health and Reserach. Global and regional estimates of  
15  
16 violence against women: prevalence and health effects of intimate partner violence  
17  
18 and non-partner sexual violence. World Health Organization 2013.  
19
- 20  
21 13. Fisher J, de Mello MC, Patel A, et al. Prevalence and determinants of common  
22  
23 perinatal mental disorders in women in low- and lower-middle-income countries: a  
24  
25 systematic review. *Bull World Health Organ* 2012;90:139-149G.  
26  
27
- 28 14. Shuib R, Endut N, Ali SH, et al. Domestic violence and women's well-being in  
29  
30 Malaysia: Issues and challenges in conducting a national study using the WHO multi-  
31  
32 country questionnaire on women's health and domestic violence against women.  
33  
34 *Procedia Soc Behav Sci*. 2013;19:475-488.  
35  
36
- 37 15. Victora CG, Huttly SR, Fuchs SC, et al. The role of conceptual frameworks in  
38  
39 epidemiological analysis: a hierarchical approach. *Int J Epidemiol*. 1997;26(1):224-7.  
40  
41
- 42 16. Hishamshah M, Ramzan M, Rashid A, et al. (2010). Belief and practices of traditional  
43  
44 postpartum care among a rural community in Penang Malaysia. *The Internet Journal*  
45  
46 *of Third World Medicine*. 2010;9(2):1-9. <https://doi.org/10.5580/49f>  
47  
48
- 49 17. Klainin P, Arthur DG. (2009). Postpartum depression in Asian cultures: A literature  
50  
51 review. *Int J Nurs Stud*. 2009;46(10):1355-73.  
52  
53 <https://doi.org/10.1016/j.ijnurstu.2009.02.012>  
54  
55  
56  
57



- 1  
2  
3 18. Institute for Public Health and Institute for Health Systems Research. National Health  
4 and Morbidity Survey (NHMS) 2011: Healthcare Demands and Out-of-Pocket Health  
5 Expenditure. Volume III. ISBN 978-983-3887-77-4.  
6  
7  
8  
9  
10 19. Institute for Public Health (IPH), Ministry of Health Malaysia. National Health and  
11 Morbidity Survey (NHMS) 2016: Maternal and Child Health. 2016:Vol II: Findings.pp  
12 272. ISBN:978-983-2387-28-2. Available at <http://www.iku.gov.my>.  
13  
14  
15  
16 20. Wan Mahmud WR, Awang A, Mohamed MN. Revalidation of the Malay version of the  
17 Edinburgh Postnatal Depression Scale (EPDS) among Malay postpartum women  
18 attending the Bakar Bata Health Centre in Alor Setar, Kedah, North West of  
19 Peninsular Malaysia. *Malays J Med Sci*. 2003;10(2):71-75.  
20  
21  
22  
23  
24  
25 21. Abdul Kadir A, Nordin R, Ismail SB, et al. Validation of the Malay version of Edinburgh  
26 Postnatal Depression Scale for Postnatal women in Kelantan, Malaysia. *Asia Pac Fam*  
27 *Med*. 2004;3(1-2):9-18.  
28  
29  
30  
31  
32 22. Saddki N, Sulaiman Z, Ali SH, et al. Validity and reliability of the Malay version of  
33 WHO Women's Health and Life Experiences Questionnaire. *J Interpers Violence*.  
34 2013;28(12):2557-2580.  
35  
36  
37  
38  
39 23. World Health Organization. WHO Multi-country Study on Women's Health and Life  
40 Events Questionnaire (version 9.9). In: WHO multi-country study on women's health  
41 and domestic violence against women: initial results on prevalence, health outcomes  
42 and women's responses. 2005. Geneva, Switzerland.  
43  
44  
45  
46  
47  
48 24. Howard LM, Oram S, Galley H, et al. Domestic violence and perinatal mental  
49 disorders: a systematic review and meta-analysis. *PLOS Medicine*.  
50 2013;10(5):e1001452.  
51  
52  
53  
54  
55  
56  
57  
58  
59  
60

- 1  
2  
3 25. Abdollahi F, Zarghami M, Azhar MZ, et al. Predictors and incidence of post-partum  
4 depression: a longitudinal cohort study. *J Obstet Gynaecol Res.* 2014.  
5 doi:10.1111/jog.12471 accessed on 3 May 2017.  
6  
7  
8  
9  
10 26. Escriba-Aguir V, Artazcoz L. Gender differences in postpartum depression: a  
11 longitudinal cohort study. *J Epidemiol Community Health.* 2011;65:320-326.  
12  
13  
14 27. Institute for Public Health (IPH), National Institutes of Health, Ministry of Health  
15 Malaysia. National Health and Morbidity Survey (NHMS) 2016: Maternal and Child  
16 Health. Vol. II: Findings. 2016. Available at <http://www.iku.gov.my>.  
17  
18  
19  
20  
21 28. Khalifa DS, Glavin K, Bjertness E, et al. Determinants of postnatal depression in  
22 Sudanese women at 3 months postpartum: a cross-sectional study. *BMJ Open.*  
23 2016;6:e009443.doi:10.1136/bmjopen-2015-009443. Accessed on 7 July 2017  
24  
25  
26  
27  
28 29. Nongrum R, Thomas E, Lionel J, et al. Domestic violence as a risk factor for maternal  
29 depression and neonatal outcomes: a hospital-based cohort study. *Indian J Psychol*  
30 *Med.* 2014;36(2):179-181.  
31  
32  
33  
34  
35 30. Nasreen HE, Edhborg M, Petzold M, et al. Incidence and risk factors of postpartum  
36 depressive symptoms in women: a population-based prospective cohort study in a  
37 rural district in Bangladesh. *J Depress Anxiety.* 2015;4:2.  
38  
39 <http://dx.doi.org/10.4172/2167-1044.1000180> accessed on 5 May 2017.  
40  
41  
42  
43  
44 31. Gaillard A, Strat YL, Mandelbrot L, et al. Predictors of postpartum depression:  
45 prospective study of 264 women followed during pregnancy and postpartum.  
46  
47 *Psychiatry Research.* 2014;215:341-346.  
48  
49  
50  
51 32. Islam MH, Broidy L, Baird K, et al. Intimate partner violence around the time of  
52 pregnancy and postpartum depression: the experience of women of Bangladesh. *PloS*  
53  
54  
55  
56  
57  
58  
59  
60

- 1  
2  
3 ONE. 2017;12(5):e0176211. <http://doi.org/10.1371/journal.pone.0176211>. Accessed  
4  
5 on 7 July 2017.  
6  
7  
8 33. Sorbo MF, Grimstad H, Bjongaard JH, et al. Adult physical, sexual, and emotional  
9  
10 abuse and postpartum depression, a population based, prospective study of 53,065  
11  
12 women in the Norwegian Mother and Child Cohort Study. *BMC Pregnancy Childbirth*.  
13  
14 2014;14:316. <http://www.biomedcentral.com/147-2393/14/316> accessed on 7 July  
15  
16 2017.  
17  
18  
19 34. Shamu S, Zarowsky C, Roelens K, et al. High-frequency intimate partner violence  
20  
21 during pregnancy, postnatal depression and suicidal tendencies in Harare, Zimbabwe.  
22  
23 *Gen Hosp Psychiatry*. 2016;38:109-114.  
24  
25  
26 35. Ludermir AB, Lewis G, Valongueiro SA, et al. Violence against women by their  
27  
28 intimate partner during pregnancy and postnatal depression: a prospective cohort  
29  
30 study. *Lancet* 2010;376:903-910.  
31  
32  
33 36. Zhang Y, Zou S, Cao Y, et al. Relationship between domestic violence and postnatal  
34  
35 depression among pregnant Chinese women. *Int J Gynaecol and Obstetrics*.  
36  
37 2012;116:26-30.  
38  
39  
40 37. Desmarais SL, Pritchard A, Lowder EM, et al. Intimate partner abuse before and  
41  
42 during pregnancy as risk factors for postpartum mental health problems. *BMC*  
43  
44 *Pregnancy Childbirth*. 2014;14:132  
45  
46  
47 38. Miura A, Fujiwara T. Intimate partner violence during pregnancy and postpartum  
48  
49 depression in Japan: a cross-sectional study. *Front Public Health*. 2017;5:81.  
50  
51 doi:10.3389/fpubh.2017.00081  
52  
53  
54  
55  
56  
57  
58  
59  
60

- 1  
2  
3 39. Dennis CL, Vigod S. The relationship between postpartum depression, domestic  
4 violence, childhood violence, and substance use: epidemiologic study of a large  
5 community sample. *Violence Against Women*. 2013;19(4):503-517.  
6  
7  
8  
9  
10 40. Castro F, Place JMS, Billings DL. Risk profiles associated with postnatal depressive  
11 symptoms among women in a public sector hospital in Mexico: the role of  
12 sociodemographic and psychological factors. *Arch Women Ment Health*.  
13 2015;18:463-471.  
14  
15  
16  
17  
18 41. Jones E, Coast E. Social relationships and postpartum depression in South Asia: a  
19 systematic review. *Int J Soc Psychiatry*. 2012;59(7):690-700.  
20  
21  
22  
23 42. Xie RH, Yang JZ, Liao SP, et al. Prenatal family support, postnatal family support and  
24 postpartum depression. *Aust N Z J Obstet Gynaecol*. 2010;50:340-345.  
25  
26  
27  
28 43. Abdullah K, Noor NM, Wok S. The perceptions of women's roles and progress: A  
29 study of Malay Women. *Social Indicators Research*, 2008;89(3):439-455.  
30  
31  
32 <https://doi.org/10.1007/s11205-008-9242-7>  
33  
34  
35 44. Ibrahim N, Abdalla M. A critical examination of Qur'an 4:34 and its relevance to  
36 intimate partner violence in Muslim families. *Journal of Muslim Mental Health*.  
37 2010;5(3):327-349. <https://doi.org/10.1080/15564908.2010.551278>  
38  
39  
40  
41 45. Oon SW, Shuib R, Ali SH, et al. Exploring the coping mechanism of women  
42 experiencing Intimate Partner Violence in Malaysia. *IJASOS*. 2016;11(5):820-825.  
43  
44  
45  
46 46. Thurgood, S., Avery, D., & Williamson, L. (2009). Postpartum Depression (PPD).  
47  
48 *American Journal of Clinical Medicine*. 2009;6(2):17-22. Retrieved from  
49  
50 <http://www.aapsus.org/articles/11.pdf> on 4 February 2018  
51  
52  
53 47. Senediak C. The value of premarital education. *ANZ J Fam Ther*. 1990;11(1):26-31.  
54  
55  
56  
57  
58  
59  
60

1  
2  
3  
4  
5  
6  
7  
8  
9  
10  
11  
12  
13  
14  
15  
16  
17  
18  
19  
20  
21  
22  
23  
24  
25  
26  
27  
28  
29  
30  
31  
32  
33  
34  
35  
36  
37  
38  
39  
40  
41  
42  
43  
44  
45  
46  
47  
48  
49  
50  
51  
52  
53  
54  
55  
56  
57  
58  
59  
60

For peer review only

1  
2  
3  
4  
5  
6  
7  
8  
9  
10  
11  
12  
13  
14  
15  
16  
17  
18  
19  
20  
21  
22  
23  
24  
25  
26  
27  
28  
29  
30  
31  
32  
33  
34  
35  
36  
37  
38  
39  
40  
41  
42  
43  
44  
45  
46  
47  
48  
49  
50  
51  
52  
53  
54  
55  
56  
57  
58  
59  
60



Figure 1: Conceptual framework illustrating hierarchical model of risk factors for postnatal depression

297x420mm (300 x 300 DPI)

1  
2  
3  
4  
5  
6  
7  
8  
9  
10  
11  
12  
13  
14  
15  
16  
17  
18  
19  
20  
21  
22  
23  
24  
25  
26  
27  
28  
29  
30  
31  
32  
33  
34  
35  
36  
37  
38  
39  
40  
41  
42  
43  
44  
45  
46  
47  
48  
49  
50  
51  
52  
53  
54  
55  
56  
57  
58  
59  
60



\*Others include communication/language barriers or duplicated name in the dataset

Figure 2: Flow diagram of respondents recruitment

297x420mm (300 x 300 DPI)

**STROBE 2007 (v4) Statement—Checklist of items that should be included in reports of *cross-sectional studies***

| Section/Topic                | Item # | Recommendation                                                                                                                                                                       | Reported on page # |
|------------------------------|--------|--------------------------------------------------------------------------------------------------------------------------------------------------------------------------------------|--------------------|
| <b>Title and abstract</b>    | 1      | (a) Indicate the study’s design with a commonly used term in the title or the abstract                                                                                               | 6                  |
|                              |        | (b) Provide in the abstract an informative and balanced summary of what was done and what was found                                                                                  | 6-7                |
| <b>Introduction</b>          |        |                                                                                                                                                                                      |                    |
| Background/rationale         | 2      | Explain the scientific background and rationale for the investigation being reported                                                                                                 | 8-10               |
| Objectives                   | 3      | State specific objectives, including any prespecified hypotheses                                                                                                                     | 10                 |
| <b>Methods</b>               |        |                                                                                                                                                                                      |                    |
| Study design                 | 4      | Present key elements of study design early in the paper                                                                                                                              | 10                 |
| Setting                      | 5      | Describe the setting, locations, and relevant dates, including periods of recruitment, exposure, follow-up, and data collection                                                      | 10-11              |
| Participants                 | 6      | (a) Give the eligibility criteria, and the sources and methods of selection of participants                                                                                          | 11-12              |
| Variables                    | 7      | Clearly define all outcomes, exposures, predictors, potential confounders, and effect modifiers. Give diagnostic criteria, if applicable                                             | 12-14              |
| Data sources/<br>measurement | 8*     | For each variable of interest, give sources of data and details of methods of assessment (measurement). Describe comparability of assessment methods if there is more than one group | 12-14              |
| Bias                         | 9      | Describe any efforts to address potential sources of bias                                                                                                                            | 12                 |
| Study size                   | 10     | Explain how the study size was arrived at                                                                                                                                            | 15                 |
| Quantitative variables       | 11     | Explain how quantitative variables were handled in the analyses. If applicable, describe which groupings were chosen and why                                                         | 15-16              |
| Statistical methods          | 12     | (a) Describe all statistical methods, including those used to control for confounding                                                                                                | 15-16              |
|                              |        | (b) Describe any methods used to examine subgroups and interactions                                                                                                                  | 15-16              |
|                              |        | (c) Explain how missing data were addressed                                                                                                                                          | 15                 |
|                              |        | (d) If applicable, describe analytical methods taking account of sampling strategy                                                                                                   | 12                 |
|                              |        | (e) Describe any sensitivity analyses                                                                                                                                                | NA                 |
| <b>Results</b>               |        |                                                                                                                                                                                      |                    |



|                          |     |                                                                                                                                                                                                              |       |
|--------------------------|-----|--------------------------------------------------------------------------------------------------------------------------------------------------------------------------------------------------------------|-------|
| Participants             | 13* | (a) Report numbers of individuals at each stage of study—eg numbers potentially eligible, examined for eligibility, confirmed eligible, included in the study, completing follow-up, and analysed            | 17    |
|                          |     | (b) Give reasons for non-participation at each stage                                                                                                                                                         | 17    |
|                          |     | (c) Consider use of a flow diagram                                                                                                                                                                           | 17    |
| Descriptive data         | 14* | (a) Give characteristics of study participants (eg demographic, clinical, social) and information on exposures and potential confounders                                                                     | 17-18 |
|                          |     | (b) Indicate number of participants with missing data for each variable of interest                                                                                                                          | 18    |
| Outcome data             | 15* | Report numbers of outcome events or summary measures                                                                                                                                                         | 19-21 |
| Main results             | 16  | (a) Give unadjusted estimates and, if applicable, confounder-adjusted estimates and their precision (eg, 95% confidence interval). Make clear which confounders were adjusted for and why they were included | 17-20 |
|                          |     | (b) Report category boundaries when continuous variables were categorized                                                                                                                                    | NA    |
|                          |     | (c) If relevant, consider translating estimates of relative risk into absolute risk for a meaningful time period                                                                                             | NA    |
| Other analyses           | 17  | Report other analyses done—eg analyses of subgroups and interactions, and sensitivity analyses                                                                                                               | NA    |
| <b>Discussion</b>        |     |                                                                                                                                                                                                              |       |
| Key results              | 18  | Summarise key results with reference to study objectives                                                                                                                                                     | 23-25 |
| Limitations              | 19  | Discuss limitations of the study, taking into account sources of potential bias or imprecision. Discuss both direction and magnitude of any potential bias                                                   | 25-27 |
| Interpretation           | 20  | Give a cautious overall interpretation of results considering objectives, limitations, multiplicity of analyses, results from similar studies, and other relevant evidence                                   | 27    |
| Generalisability         | 21  | Discuss the generalisability (external validity) of the study results                                                                                                                                        | 26    |
| <b>Other information</b> |     |                                                                                                                                                                                                              |       |
| Funding                  | 22  | Give the source of funding and the role of the funders for the present study and, if applicable, for the original study on which the present article is based                                                | 28    |

\*Give information separately for cases and controls in case-control studies and, if applicable, for exposed and unexposed groups in cohort and cross-sectional studies.

**Note:** An Explanation and Elaboration article discusses each checklist item and gives methodological background and published examples of transparent reporting. The STROBE checklist is best used in conjunction with this article (freely available on the Web sites of PLoS Medicine at <http://www.plosmedicine.org/>, Annals of Internal Medicine at <http://www.annals.org/>, and Epidemiology at <http://www.epidem.com/>). Information on the STROBE Initiative is available at [www.strobe-statement.org](http://www.strobe-statement.org).
